1 Title: Patterns of pan-genome occupancy and gene co-expression under water-deficit in *Brachypodium*  
2 *distachyon*.

3 Authors: Rubén Sancho<sup>1,2</sup>, Pilar Catalán<sup>1,2</sup>, Bruno Contreras-Moreira<sup>2,3,4</sup>, Thomas E. Juenger<sup>5</sup>, David L.  
4 Des Marais\*<sup>6</sup>

5

6 Affiliations:

7 <sup>1</sup> Department of Agricultural and Environmental Sciences, High Polytechnic School of Huesca,  
8 University of Zaragoza, Huesca, Spain

9 <sup>2</sup> Grupo de Bioquímica, Biofísica y Biología Computacional (BIFI, UNIZAR), Unidad Asociada al CSIC,  
10 Spain

11 <sup>3</sup> Estación Experimental de Aula Dei-Consejo Superior de Investigaciones Científicas, Zaragoza, Spain

12 <sup>4</sup> Fundación ARAID, Zaragoza, Spain

13 <sup>5</sup> Department of Integrative Biology, The University of Texas at Austin, Austin, TX. USA

14 <sup>6</sup> Department of Civil and Environmental Engineering, Massachusetts Institute of Technology,  
15 Cambridge, MA. USA

16

17 \* Corresponding author:

18 David L. Des Marais. 15 Vassar Street Room 48-325, Cambridge, MA, 02139 (USA). Phone:

19 617.258.6482. Email: [dldesmar@mit.edu](mailto:dldesmar@mit.edu)

20 Running Title: Transcriptome variation in *Brachypodium*

21

22 **ABSTRACT**

23 Natural populations are characterized by abundant genetic diversity driven by a range of different types of  
24 mutation. The tractability of sequencing complete genomes has allowed new insights into the variable  
25 composition of genomes, summarized as a species pan-genome. These analyses demonstrate that many  
26 genes are absent from the first reference genomes, whose analysis dominated the initial years of the  
27 genomic era. Our field now turns towards understanding the functional consequence of these highly  
28 variable genomes. Here, we analyzed weighted gene co-expression networks from leaf transcriptome data  
29 for drought response in the purple false brome *Brachypodium distachyon* and the differential expression  
30 of genes putatively involved in adaptation to this stressor. We specifically asked whether genes with  
31 variable “occupancy” in the pan-genome – genes which are either present in all studied genotypes or  
32 missing in some genotypes – show different distributions among co-expression modules. Co-expression  
33 analysis united genes expressed in drought-stressed plants into nine modules covering 72 hub genes (87  
34 hub isoforms), and genes expressed under controlled water conditions into 13 modules, covering 190 hub  
35 genes (251 hub isoforms). We find that low occupancy pan-genes are under-represented among several  
36 modules, while other modules are over-enriched for low-occupancy pan-genes. We also provide new  
37 insight into the regulation of drought response in *B. distachyon*, specifically identifying one module with  
38 an apparent role in primary metabolism that is strongly responsive to drought. Our work shows the power  
39 of integrating pan-genomic analysis with transcriptomic data using factorial experiments to understand  
40 the functional genomics of environmental response.

## 41 INTRODUCTION

42 Soil water availability is a critical factor determining plant growth, development, and reproduction  
43 (Bohnert, Nelson, & Jensen, 1995). Plants are able to cope with and acclimate to a range of soil water  
44 contents through the reprogramming of their physiology, growth, and development over time scales  
45 ranging from hours to seasons (Chaves, Maroco, & Pereira, 2003). Many of these acclimation strategies  
46 arise from altered transcriptional profiles (Fisher et al., 2016; Miao, Han et al., 2017). Drought-responsive  
47 gene regulatory pathways have been investigated extensively in model plant systems such as *Arabidopsis*  
48 *thaliana*, maize, and rice (Borah et al., 2017; Hayano-Kanashiro et al., 2009; Janiak, Kwa, & Szarejko,  
49 2015; Nakashima, Ito, & Yamaguchi-Shinozaki, 2009; Nakashima, Yamaguchi-Shinozaki, & Shinozaki,  
50 2014). A clear emerging theme, however, is that diverse species and varieties of plants exhibit diverse  
51 stress response mechanisms (Des Marais et al., 2012; Juenger, 2013; Pinheiro & Chaves, 2011), often  
52 controlled by complex regulatory networks. Understanding the genetic control of this phenotypic  
53 diversity is a priority for understanding the response of natural populations to climate change, and for  
54 designing resilient crop species (Benfey & Mitchell-Olds, 2008).

55 Recent studies have brought attention to the remarkable variation in gene content among plant  
56 populations (Alonge et al., 2020; Gao et al., 2019; Gordon et al., 2017; Haberer et al., 2020), reflected in a  
57 species' pan-genome. A pan-genome refers to the genomic content of a species as a whole, rather than the  
58 composition of a single, reference, individual genotype (Koonin & Wolf, 2008). In practice, pan-genomes  
59 are estimated by deeply resequencing the genomes of a diversity panel of genotypes, often using a  
60 reference genome to aid in final assembly and annotation (Lei et al., 2021). In the diploid model grass  
61 *Brachypodium distachyon*, genomic analysis of 56 inbred natural "accessions" revealed that the total pan-  
62 genome of the species comprised nearly twice the number of genes in any single accession (Gordon et al.,  
63 2017). Remarkably, only 73% of genes in a given accession are found in at least 95% of the other  
64 accessions (Gordon et al., 2017) – so-called "core genes" (universal or nearly universal genes; Koonin &  
65 Wolf, 2008) and "soft-core genes" (found in at least 95% of accessions; Kaas et al. 2012) – suggesting  
66 that a large number of genes are unique to subsets of accessions or even to individual accessions. The list  
67 of core genes in *B. distachyon* is enriched for annotations associated with essential cellular processes such  
68 as primary metabolism. Lower-occupancy genes, or "shell genes," are found in 5-94% of accessions and  
69 their annotations are enriched for many processes related to environmental response, including disease  
70 resistance. Similar patterns have been observed in the pan-genomes of *Arabidopsis thaliana*, barley,  
71 sunflower, and an ever-growing number of additional plant species (Bayer et al., 2020; Contreras-Moreira  
72 et al., 2017; Hübner et al., 2019). The DNA sequences of core genes bear the hallmark of strong purifying

73 selection and are typically expressed at a higher level and in more tissues as compared to shell genes.  
74 Shell genes may be the result of gene duplications or deletions in the ancestor of a subset of studied  
75 genotypes and, indeed, the vast majority of shell genes in *B. distachyon* appear to be functional, as  
76 homologs are found in other species' genomes (Gordon et al., 2017).

77 The preceding observations raise the intriguing possibility that shell genes may represent segregating  
78 variation that could be shaped by natural selection and thereby facilitate local adaptation or adaptive  
79 responses to a variable environment. Multiple studies in *Arabidopsis thaliana* demonstrate the role of  
80 segregating functional gene copies – effectively large-effect mutations – in shaping whole-plant response  
81 to the abiotic environment (Monroe et al., 2016, 2018). The phenotypic effect size of a mutation can  
82 determine the likelihood that the mutant will become fixed in a population, with large-effect mutations  
83 more likely than not to confer deleterious phenotypes that may be removed from populations by natural  
84 selection (Fisher, 1930). The observation that any two accessions of *B. distachyon* likely differ in the  
85 presence or absence of hundreds of functional gene copies begs the question as to how potentially  
86 function-changing gene deletions escape the purging effects of purifying selection. Pan-genomics requires  
87 that we reconceptualize how we interpret “gene loss” as we move beyond a reference-genome view of  
88 genome function. Genes identified as “missing” from a subset of accessions might represent deletions of  
89 genes whose function was no longer constrained by purifying selection in some novel environment,  
90 duplicated genes that originated in a subset of accessions and thus are absent in other accessions, or  
91 paralogs that were both present in a common ancestor and then reciprocally lost in subsets of accessions.

92 The pleiotropic effect of a mutation can be affected by the number of genes with which it interacts  
93 (Jeong et al., 2001); if a gene has relatively few interacting partners then its presence or absence in a  
94 particular accession may have a small fitness effect and thus be maintained in populations. Similarly, the  
95 efficacy of selection to purge deleterious alleles may be reduced if a gene is only expressed in a subset of  
96 environments experienced by a species (Paaby & Rockman, 2014). In the context of pan-genomes, we  
97 consider gene presence/absence polymorphisms as mutations, and we explore functional gene turnover by  
98 testing the hypothesis that shell genes and core genes differ in their topological positions in  
99 environmentally responsive gene co-expression networks.

100 Gene co-expression networks are widely used to interpret functional genomic data by assessing  
101 patterns of correlation among genes via a threshold that assigns a connection weight to each gene pair  
102 (Langfelder & Horvath, 2008; Zhang & Horvath, 2005). Sets of genes with similar expression profiles are  
103 assigned to modules by applying graph clustering algorithms (Mao et al., 2009). Genes, or “nodes,” in  
104 such networks show considerable variation in the extent to which their expression co-varies with other

105 genes. As such, co-expression networks are generally considered “scale-free” in the sense that few nodes  
106 have many neighboring nodes while many nodes have few neighboring nodes (Guelzim et al., 2002).  
107 Modules are often comprised of genes with similar functions (Stuart et al., 2003; Wolfe, Kohane, &  
108 Butte, 2005). High connectivity “hub” genes that show a large number of interactions with other genes  
109 within a weighted co-expression network are candidates for key players in regulating cellular processes  
110 (Albert, Jeong, & Barabási, 2000; Carlson et al., 2006; Dong & Horvath, 2007). As such, hub genes might  
111 be expected to encode essential cellular functions and thus show pleiotropic effects when mutated or  
112 deleted. By contrast, genes with fewer close co-expression relationships are often situated on the  
113 periphery of networks and might, therefore, exhibit fewer pleiotropic effects when missing or mutated  
114 (Des Marais et al., 2017a; Masalia, Bewick, & Burke, 2017; Porth et al., 2014). In this context, we  
115 hypothesize that pan-genome core genes may be over-represented among co-expression network “hub-  
116 genes,” as both appear to be involved in core cellular processes and may therefore show deleterious  
117 effects when deleted. Conversely, we hypothesize that pan-genome “shell genes” – whose patterns of  
118 expression and thereby phenotypic effects are more restricted and condition-specific – will be enriched  
119 among lowly connected (non-hub) genes in gene co-expression networks.

120 Here, we study the relationship between a plant’s pan-genome and its gene co-expression networks  
121 using *Brachypodium distachyon*. *Brachypodium* is a small genus of the subfamily Pooideae (Poaceae)  
122 that contains ~20 species distributed worldwide (Catalán et al., 2016; Scholthof et al., 2018; Hasterok et  
123 al. 2022). The annual diploid species *B. distachyon* is a model for temperate cereals and biofuel grasses  
124 (Vogel et al. 2010; Mur et al. 2011; Catalán et al. 2014; Scholthof et al. 2018); a reference genome for  
125 one *B. distachyon* accession, Bd21 (IBI, 2010) is now complemented by 54 deeply resequenced natural  
126 accessions (Gordon et al., 2017). Recent studies demonstrate the utility of *B. distachyon* and its close  
127 congeners for elucidating the evolution and ecology of plant-abiotic interactions, focusing especially on  
128 responses to soil drying, aridity, and water use strategy (Des Marais & Juenger, 2016; Des Marais et al.,  
129 2017b; Monroe et al. 2021; Fisher et al., 2016; Handakumbura et al., 2019; Manzaneda et al., 2015, 2012;  
130 Martínez et al., 2018; Skalska et al., 2020; Verelst et al., 2013). In the present study, we first identify and  
131 characterize gene co-expression modules associated with response to soil drying. We then test the  
132 hypothesis that the occupancy of pan-genes – whether they are part of the shell or core gene sets of the  
133 pan-genome – is associated with their connectivity in the *B. distachyon* gene co-expression network. Our  
134 work demonstrates the dynamic nature of plant genomes and sets up future work on the functional  
135 consequences of diversity on the evolution of gene regulatory networks.

136

## 137 MATERIALS AND METHODS

### 138 Plant material, experimental design, total-RNA extraction and 3' cDNA tag libraries preparation

139 Sampling herein follows our earlier work documenting physiological and developmental response of  
140 33 diploid natural accessions of *Brachypodium distachyon* (L.) P. Beauv. to soil drying (Figure 1; Table  
141 S1) (Des Marais et al., 2017b). The sampled accessions were inbred for more than five generations (Filiz  
142 et al., 2009; Vogel et al., 2006, 2009) and represent the geographic and ecological diversity of *B.*  
143 *distachyon* across the Mediterranean region. Whole genome resequencing data is available for all studied  
144 accessions (Gordon et al., 2017).

145 A total of 264 individual plants from the 33 accessions were grown under two greenhouse conditions,  
146 restriction of water (drought, D) and well-watered (water, W). We sampled four biological replicates per  
147 treatment and accession combinations [33 accessions x 4 replicates x 2 treatments (D and W)]. For a full  
148 description of the growth and treatment conditions, please see Des Marais, Lasky, et al. (2017b). In short,  
149 seeds were stratified at 6°C for 14d and then greenhouse-grown in 600 mL of Profile porous ceramic  
150 rooting media (Profile Products) in Deepot D40H pots (650 mL; Stuewe & Sons). For the first 21d of  
151 growth, all plants were watered to field capacity every other day. Daytime high temperatures ranged from  
152 23°C to 28°C and night-time lows from 14°C to 18°C. On day 21 four treatment regimes were  
153 implemented: Cool Wet, Cool Drought, Hot Wet, and Hot Drought, with Drought and Wet plants  
154 spatially randomized within single blocks of Hot or Cool conditions. The hot treatment raised air  
155 temperatures in the plant canopies by ~10°C. Because temperature was confounded with experimental  
156 block in the design used for the current study, we did not include a temperature effect in any of the  
157 statistical models used herein. Well-watered plants (hereafter “Water”) were watered to field-capacity  
158 every second day with fresh water, whereas drought plants (hereafter “Drought”) were hand-watered daily  
159 by pipette such that the soil water was reduced by 5% each day. The final soil water content of Drought  
160 plants on day 11 of treatment – 32d post-germination – was 45% field capacity, which corresponds to a  
161 decrease in water potential of 1.2 MPa as compared to field capacity in this growth media (Des Marais et  
162 al., 2012).

163 For each plant, the two youngest, fully expanded leaves of the tallest tiller were excised with a razor  
164 blade at the base of the lamina and flash-frozen on liquid nitrogen. Tissue was ground to a fine powder  
165 under liquid nitrogen using a Mixer Mill MM 300 (Retsch GmbH). RNA was extracted using the Sigma  
166 Spectrum Total Plant RNA kit, including on-column DNase treatment, following the manufacturer's  
167 protocol, and quantified using a NanoDrop spectrophotometer (Thermo Scientific). We used a RNA-Seq

168 library protocol (3' cDNA tag libraries with fragment of 300-500 bp) for sequencing on the Illumina  
169 HiSeq platform adapted from Meyer et al. (2011). This Tag-Seq method yields only one sequence per  
170 expressed transcript in the RNA pool, allowing for higher sequencing coverage per gene as a function of  
171 total sequencing effort (Tandonnet & Torres, 2017).

## 172 **Pre-processing of sequences, quantifying transcript abundances, normalizing procedures, and** 173 **controlling batch effects**

174 Sequencing was carried out using an Illumina HiSeq2500 platform (100 bp Single-End, SE,  
175 sequencing). Quality control of SE reads was performed with FastQC software. Adapters and low quality  
176 reads were removed and filtered with Trimmomatic-0.32 (Bolger, Lohse, & Usadel, 2014). Total numbers  
177 of raw and filtered SE reads for each accession and treatment are shown in Table S2. Quantifying the  
178 abundances of transcripts from RNA-Seq data was done with Kallisto v0.43.1 (Bray et al., 2016). To  
179 accommodate the library preparation and sequencing protocols (3' tag from fragments of 300-500 bp),  
180 pseudoalignments of RNA-Seq data were carried out using as references 500 bp from the 3' tails of the *B.*  
181 *distachyon\_314\_v3.1* transcriptome (IBI 2010;  
182 [https://phytozome.jgi.doe.gov/pz/portal.html#!info?alias=Org\\_Bdistachyon](https://phytozome.jgi.doe.gov/pz/portal.html#!info?alias=Org_Bdistachyon)). We applied estimated  
183 average fragment lengths of 100 bp and standard deviations of fragment length of 20. Resulting numbers  
184 of transcripts per million (TPM) were recorded.

185 Exploratory analysis of the data set and the subsequent filtering and normalization of transcripts  
186 abundance between samples, and the *in silico* technical replicate steps (bootstrap values computed with  
187 Kallisto), were conducted with the Sleuth package (Pimentel et al., 2017). A total of 16,386 targets  
188 (transcripts/isoforms) were recovered after the normalizing and filtering step using Sleuth. This program  
189 was also used for batch-correction of data and of differentially expressed (DE) genes. To account for  
190 library preparation batch effects, date of library preparation was included as a covariate with condition  
191 variable in the full model (Table S2).

## 192 **Co-expression network analysis of normalized transcripts abundance**

193 Co-expression networks for the Drought and Water (control) data sets were carried out using the  
194 transcripts per million (TPM) estimates and the R package WGCNA (Langfelder and Horvath 2008). We  
195 analyzed 16,386 transcripts that were filtered and normalized for 127 Drought and 124 Water individual  
196 samples (individual plants). After the removal of putative outliers, we retained 121 Drought and 108  
197 Water samples that were used for network construction.

198 Identical parameters were used for the Drought and the Water data sets to construct their respective  
199 co-expression networks. The *BlockwiseModules* function was used to perform automatic network  
200 construction and module detection on the large expression data set of transcripts. Parameters for co-  
201 expression network construction were fitted checking different values. We chose the Pearson correlation  
202 and unsigned network type, soft thresholding power 6 (high scale free,  $R^2 > 0.85$ ), a minimum module size  
203 of 30, and a medium sensitivity (deepSplit = 2) for the cluster splitting. The topological overlap matrix  
204 (TOM) was generated using the TOMtype unsigned approach. Module clustering was performed with  
205 function *cutreeDynamic* and the Partitioning Around Medoids (PAM) option activated. Module merging  
206 was conducted with mergeCutHeight set to 0.30.  $K_{diff}$  was calculated using WGCNA to estimate the  
207 relationship between connectivity among genes within vs between co-expression modules.

208 Both isoform and gene counts were calculated. Isoform counts included all transcripts identified (e.g.,  
209 Bradi1g1234.1; Bradi1g1234.2; Bradi1g1234.3) and gene counts only included different genes expressed,  
210 thus different isoforms from the same gene were reduced to a single gene count in each case (e.g.,  
211 Bradi1g12345.1 and Bradi1g12345.2 are two isoforms of one gene, Bradi1g12345).

#### 212 **Detection of highly connected nodes (hub genes/ isoforms) within co-expression networks**

213 Three representative descriptors of modules, module eigengene (ME), intramodular connectivity  
214 ( $k_{IM}$ ), and eigengene-based connectivity ( $k_{ME}$ ; or its equivalent module membership, MM) were  
215 calculated using the WGCNA package. Briefly, ME is defined as the first principal component of a given  
216 module and is often considered to represent the gene expression profiles within the module.  $k_{IM}$  measures  
217 how connected, or co-expressed, a given gene is with respect to the genes of a particular module. Thus,  
218 intra-modular connectivity is also the connectivity in the subnetwork defined by the module. MM is the  
219 correlation of gene expression profile with the module eigengene (ME) of a given module. MM values  
220 close to 1 or -1 indicate genes highly connected to the module. The sign of MM indicates a positive or a  
221 negative relationship between a gene and the eigengene of the module (Langfelder & Horvath, 2010).  
222 Genes with absolute MM value over 0.9 were considered “hub genes.” Correlations between MM values  
223 transformed by a power of  $\beta = 6$  and  $k_{IM}$  values were also calculated.

#### 224 **Pan-genome occupancy of clustered, hub, and differentially expressed genes across accessions**

225 Because the *B. distachyon* accessions studied herein comprise a subset of those included in the  
226 original pan-genome (Gordon et al. 2017), we re-ran the clustering procedures used in our earlier analysis  
227 with only the 33 accessions used here. We clustered CDS sequences from the annotated genomes of each



228 of the studied accessions to define core, soft-core, and shell genes with the software  
229 GET\_HOMOLOGUES-EST v03012018 (Contreras-Moreira et al., 2017) using the OMCL algorithm (-  
230 M) and a stringent percent-sequence identity threshold (-S 98). The resulting pan-genome matrix was  
231 interrogated to identify “core” genes observed in all 33 accessions, “soft-core” genes observed in 32 and  
232 31, and “shell” genes observed in 30 or fewer accessions. Occupancy was defined as the number of  
233 accessions that contain a particular gene model. We tested whether each module showed an excess or  
234 deficit of shell genes as compared to genome averages of pan-gene occupancy using a Fisher’s Exact  
235 Test, as implemented in the R programming language (R Core Team, 2022).

### 236 **Enrichment and GO/KEGG annotation of clustered genes**

237 Gene ontology (GO) and the Kyoto Encyclopedia of Genes and Genomes (KEGG) annotations for  
238 the *B. distachyon* 314 (Bd21 accession) v.3.1 reference genome were retrieved  
239 (<http://phytozome.jgi.doe.gov/>; IBI 2010). Gene lists were tested for functional enrichments with the  
240 PANTHER (Protein ANalysis THrough Evolutionary Relationships) overrepresentation test  
241 (<http://www.pantherdb.org>). The original *B. distachyon* 314 (Bd21 accession) v.3.1 gene ids were  
242 converted to v.3.0 with help from Ensembl Plants (Howe et al., 2020) to match those in PANTHER16.0  
243 (Mi et al., 2021). Tests were conducted on all genes and on both conditions -- Drought and Water --  
244 applying the Fisher's Exact test with False Discovery Rate (FDR) multiple test correction. This analysis  
245 was applied on different data sets: all genes, and pan-genome core, soft-core, and shell genes for each co-  
246 expressed module.

### 247 **Drought versus Watered modular structure preservation and comparison between consensus and** 248 **set-specific modules**

249 Permutation tests were performed to check for preservation of the module topology in the Drought  
250 (discovery data) and the Water (test data) networks using both the approach of Langfelder et al.  
251 (Langfelder, Luo, Oldham, & Horvath, 2011) as well as the modulePreservation function of the NetRep  
252 (Ritchie et al. 2016) R package with null=”all” (include all nodes) option for RNA-Seq data. All NetRep  
253 test statistics (Module coherence, Average node contribution, Concordance of node contributions, Density  
254 of correlation structure, Concordance of correlation structure, Average edge weight, and Concordance of  
255 weighted degree) were evaluated through permutation analysis; therefore, a module was considered  
256 preserved if all the statistics had a permutation test P-value < 0.01. Searching for modules that could play  
257 a role in drought response, we focused on Drought modules that were unpreserved in the Water network  
258 (P-value > 0.01 in at least 1 of the seven statistics presented in Ritchie et al. (2016). The Consensus

259 modules (Cons) and the respective relationships between Consensus and Drought (D) and Water (W)  
260 modules were performed as described in Langfelder and Horvath (2008).

### 261 **Annotations of upstream DNA motifs in the co-expression modules**

262 Genes assigned to modules in the Drought and Water networks were further analyzed with the  
263 objective of discovering DNA motifs putatively involved in their expression in each module. Motif  
264 analysis was carried out using a protocol based on RSAT::Plants (Ksouri et al., 2021). This approach  
265 allowed us to discover DNA motifs enriched in the promoter regions of co-expressed genes and to match  
266 them to curated signatures of experimentally described transcription factors. First, -500 bp (upstream) to  
267 +200 bp (downstream) sequences around the transcription start sites of the genes detected in each module  
268 and 50 random negative controls from other gene promoter regions of equal size were extracted from the  
269 *B. distachyon* Bd21 v3.0 (Ensembl Plants version 46) reference genome. Then, the peak-motifs (Thomas-  
270 Chollier et al., 2012) option was used to discover enriched motifs applying a 2<sup>nd</sup> order Markov genomic  
271 model, and GO enrichment was computed for them. The analyses generated a report with links to similar  
272 curated motifs in the database footprintDB as scored with normalized correlation (Ncor) (Sebastian and  
273 Contreras-Moreira 2014). For each module a highly supported DNA motif was selected according to  
274 Ncor, e-value, and the number of sites (i.e., putative cis-regulatory elements, CREs) used to compile the  
275 motif. The matrix-scan tool (Turatsinze et al., 2008), with a weight threshold set to 70% of the motif  
276 length (60% for the small module D8), was used to scan the discovered motifs and to identify individual  
277 genes within each module harboring putative CREs.

278 All the protein sequences predicted for each co-expression module were analyzed using iTAK (Plant  
279 Transcription factor & Protein Kinase Identifier and Classifier) online (v1.6) (Zheng et al., 2016) to  
280 annotate their respective transcription factors, transcriptional regulators and related protein kinases  
281 (classification system by Lehti-Shiu and Shiu (2012)).

### 282 **Differentially expressed (DE) isoforms/genes**

283 In order to determine how many isoforms and genes were differentially expressed between the two  
284 treatments (D vs W), the two data sets were analyzed through the sleuth\_result function (Pimentel et al.,  
285 2017). This function computes likelihood ratio tests (LRT) for null (no treatment effect) and alternative  
286 (treatment effect) hypotheses, attending to the full and reduced fitted models. A significant q-value  $\leq 1E-$   
287 6 threshold was fixed to detect DE isoforms. The 50 most differentially expressed genes (25 up-regulated

288 and 25 down-regulated) were classified based on fold-change of the average TPM values between the  
289 drought and water treatments.

## 290 **Data availability**

291 The *Brachypodium distachyon* filtered RNA-Seq data were deposited in the ENA (European  
292 Nucleotide Archive; <https://www.ebi.ac.uk/ena>) with the consecutive accession numbers from  
293 ERR6133302 to ERR6133575. All the R scripts, supplementary Excel files, TPM counts and adjacency  
294 matrices are available in the Github repository identified by the following doi: xxxxxxxxxxxx created using  
295 Zenodo.

296

## 297 **RESULTS**

298 Our RNA-Seq dataset comprised 121 Drought and 108 Water samples, obtained from 33 inbred  
299 accessions of *B. distachyon* (Figure 1). After the filtering and quality control steps, we identified 16,386  
300 transcripts in our analyses comprising 4,941 isoforms of 3,789 differentially expressed (DE) genes  
301 between the water and drought treatments (Supplementary files S1; S2). Of these genes, 2,808 were  
302 upregulated (3,591 isoforms) and 980 downregulated (1,350 isoforms) in D vs W conditions. One gene  
303 (Bradi1g09950) showed both up-regulated (Bradi1g09950.2) and down-regulated (Bradi1g09950.1)  
304 isoforms under drought conditions (Supplementary file S2).

### 305 **Modular distribution of genes in the gene co-expression networks**

306 The 33 genetically diverse accessions, along with random experimental variance, provided a wealth  
307 of expression variance that was leveraged to estimate major axes of variation – co-expression modules –  
308 from the RNA-Seq data. The modular distribution of genes in the Drought and Water gene co-expression  
309 networks showed differences both in the number and the size of the modules (Figures S1a,b and S2a,b;  
310 Tables 1a,b and S3a,b). The Drought co-expression network comprised 9 modules (D1-D9) containing a  
311 total of 5,020 isoforms (min = 38, max = 2,477 isoforms per module), corresponding to 4,006 genes (min  
312 = 27, max = 1,986 genes per module). The largest D1 module contained 15.1% of the isoforms (16.1% of  
313 the genes) whereas two modules (D2, D3) clustered 4-6% of the isoforms and genes each and the  
314 remaining modules clustered  $\leq 2\%$  of isoforms and genes each (Fig. S1a; Table 1a). 11,366 isoforms  
315 (69.4%; 8,313 genes, 67.4%) were not clustered in any Drought module using our criteria (gray or “zero”  
316 D0 module) (Figs. S1a and S2a; Table 1a). The Water co-expression network showed 13 modules (W1-

317 W13) containing a total of 6,711 isoforms (min = 48, max = 1,866 isoforms per module), corresponding  
318 to 5,407 genes (min = 40, max = 1,439 genes per module). The largest W1 contained 11.4% of the  
319 isoforms (11.6% of the genes) whereas six modules (W2-W7) clustered over >2-6% of the isoforms and  
320 genes and the remaining six modules  $\leq 2\%$  each (Fig. S1b; Table 1b). 9,675 isoforms (59.0%; 6,934  
321 genes, 56.0%) were not clustered in any Water module (gray or “zero” W0 module; Figs. S1b and S2b;  
322 Table 1b). Hereafter, co-expression modules identified in the Drought RNA-Seq dataset will be labeled  
323 with the prefix “D” while those modules identified in the Water (control) dataset will have the “W”  
324 prefix.

325 While the genes comprising co-expression modules likely represent functionally related genes,  
326 modules are not discrete entities and many genes within a module are likely co-expressed with genes in  
327 other modules. The largest Drought modules showed a positive (D1, D2, D3, D4, and D5) or slightly  
328 negative (D6 and D7) mean  $k_{diff}$ , while the smallest modules had more negative values (D8 and D9)  
329 (Table 1a). Negative  $k_{diff}$  values for a node indicate that connectivity out of the module is higher than  
330 intra-modular connectivity. Similarly, the Water modules showed positive mean  $k_{diff}$  values in the largest  
331 modules (W1, W3, W5, W6, W7, and W9) or slightly negative (W4), with the exception of one large and  
332 one intermediate modules (W2 and W8) both having negative values similar to those of the smallest  
333 modules (Table 1b). High positive linear correlations between MM values and  $k_{IM}$  values were recovered  
334 in both Drought (Fig. S3a) and Water (Fig. S3b) networks, thus validating the criterion of high MM  
335 ( $>0.9$ ) for selecting hub genes. Collectively, these results suggest that modules of both Drought and Water  
336 networks were statistically well-supported but also that many of their genes likely share transcriptional  
337 activity with genes included in other modules.

338

### 339 **Preservation and correspondence of Drought and Water networks**

340 We tested the hypothesis that some co-expression modules are only observed under one of our two  
341 treatment conditions using two approaches. First, a permutation test was performed using NetRep (Ritchie  
342 et al., 2016) to test for the preservation of module topology in the Drought versus the Water networks,  
343 defined as discovery and test data sets, respectively. This test comprises seven topological statistics on  
344 each module and condition (drought vs water), quantifying the replication of the structural relationship  
345 between nodes composing each module under the null hypothesis that the module of interest is not  
346 preserved. All Drought and Water modules were topologically preserved according to the seven NetRep  
347 statistics (permutation test P-values  $< 0.01$ ). We further tested for correspondence between Drought (D)

348 and Water (W) set-specific and Drought-Water Consensus (Cons) co-expression modules using WGCNA  
349 (Fig. 2a,b). Consensus modules are those shared by two or more networks (Langfelder & Horvath, 2007).  
350 We found that several Drought specific modules were comprised of no or very few isoforms included in  
351 the Consensus modules (Fig. 2a). Thus, the Drought modules D5 (green), D7 (black) and D9 (magenta)  
352 did not show a clear correspondence with consensus modules. The seemingly conflicting results between  
353 NetRep – which detected module preservation between Drought and Water modules – and WGCNA –  
354 which identified three modules that were not preserved – reflected the different sensitivities of these two  
355 approaches to changing co-expression relationships within modules. This suggested that all modules were  
356 preserved in a broad sense between treatments, but that nodes within modules D5, D7, and D9 could have  
357 slightly different co-expression relationships than those observed in the corresponding modules in the  
358 Water treatment. We also found Water specific modules (Fig. 2b), W1 (turquoise), W6 (red), W8 (pink),  
359 and W12 (tan), that did not overlap with the Consensus modules or overlapped only with the non-co-  
360 expressed gray module. W1 and W6 overlapped with the gray consensus module, whereas the smaller  
361 modules W8 and W12 did not overlap with any consensus module.

362 Seven modules in the Drought network and eleven in the Water network showed a significant GO  
363 term enrichment (Table 2a,b; Supplementary file S3). Both networks shared modules enriched for  
364 different biological processes. Potentially equivalent modules between the D and W networks were  
365 inferred attending to the common consensus module with which they overlapped (Figure 2a,b) and their  
366 GO enrichments (Fig. 2c). Thus, the D1 and W2 modules matched Cons1 and were GO-enriched in  
367 nitrogen, amide, and peptide metabolic and biosynthetic processes, D2 and W10 matched Cons4 and were  
368 enriched in the photosynthesis, D3 and W3 matched Cons3 and were enriched in processes of transport  
369 and locations of compounds, D4 and W9 were enriched in nucleic acid metabolic processes, and D8 and  
370 W13 in nitrogen, amide, and peptide biosynthetic and metabolic processes. However, some modules  
371 showed enrichment in biological process unique to one or the other co-expression network. For example,  
372 D5 is enriched in genes involved in protein folding, response to heat, temperature, and abiotic stimulus,  
373 and W6 in genes predicted to be involved in cell wall organization or biogenesis. Collectively, these co-  
374 expression analyses suggest that the detected modules represent groups of functionally related genes, and  
375 that many functional relationships among genes were conserved in the Water and Drought networks.

### 376 **Regulatory motifs of genes in the Drought and Water modules**

377 We detected statistically over-represented sequence motifs upstream of the gene sequences in several  
378 modules. These motifs represent putative *cis*-regulatory elements (CREs) located in proximal promoter  
379 regions of co-expressed genes in the Drought (Table 3a; Fig. S4a) and Water (Table 3b; Fig. S4b)

380 networks. A generally low but variable proportion of genes harboring putative CREs in their proximal  
381 promoters was detected in each module. The drought (Table 3a) and water (Table 3b) modules showed  
382 between 3.5-54.2% and 0.1-23% of genes with the predicted CREs, respectively. Genes in the same  
383 module shared a conserved regulatory architecture. For example, calmodulin-binding CREs were  
384 enriched in the D4 (associated with nucleobase-containing compound, heterocycle and nucleic acid  
385 metabolic processes GO terms) and W9 modules (also enriched for nucleobase-containing compound GO  
386 processes, among others). We also observed enriched motifs in treatment-specific modules, like the  
387 proximal promoters of 27.8% of the genes in module D5 contained CREs similar to those bound by  
388 transcription factor B-3 (Table 3a) (Scharf et al., 2012), known to regulate heat shock responses in  
389 *Arabidopsis thaliana* (Bechtold et al., 2013; Guo et al., 2016; Nover et al., 2001).

390 Additionally, all the predicted encoded proteins in each module were analysed to annotate the  
391 transcription factors (TF), transcriptional regulators (TR), and kinases (Table S4a,b). For example, TRs  
392 annotated in the D5 module – identified above as putatively drought-specific -- are involved in responses  
393 to abscisic acid, heat stress, water deprivation and defense, and in zinc, chromatin, and metal ion binding  
394 (Table S4a).

#### 395 **Hub nodes of the Drought and Water networks**

396 Hub nodes were detected in both the Drought (Table 1a) and the Water (Table 1b) networks. A total  
397 of 87 (0.53%; 1.73% excluding grey module) hub node isoforms from 72 (0.58%; 1.8% excluding grey  
398 module) hub genes were identified in the Drought network, and 251 (1.53%; 3.74% excluding grey  
399 module) hub node isoforms from 190 (1.53%; 3.51% excluding grey module) hub genes in the Water  
400 network. Roughly, more than twice per-module fraction of hubs was detected in the Water network  
401 (1.53% hub nodes/ 1.53% hub genes; Table 1b) compared to the Drought network (0.53% hub nodes/  
402 0.58% hub genes; Table 1a).

#### 403 **Pan-genome analyses: occupancy of all clustered and hub genes**

404 The studied pan-genome subset contained 34,310 pan-genome clusters (hereafter “pan-genes”) which  
405 were classified by the number of accessions with a gene model represented in a given cluster to determine  
406 their occupancy. We found 16,057 (46.8%) core gene clusters with at least one member in every  
407 accession. We analyzed these core genes along with the 5,642 (16.4%) clusters from the soft-core pan-  
408 genome (occupancy in 31 or 32 accessions) to account for gene annotation errors and uncertainty with  
409 orthology assignments. In contrast, there were 12,611 (36.8%) shell genes (i.e., observed in fewer than 31

410 accessions). Of the 34,310 pan-genes, 15,848 were represented by sequenced RNA tags, after our filtering  
411 and normalizing steps. The occupancy of the expressed pan-genes was 12,137 (76.6%) core, 1,869  
412 (11.8%) soft-core and 1,842 (11.6%) shell genes. The discrepancy between the total number of pan-genes  
413 and that of genes represented by RNA-Seq tags may have been caused by the filtering of lowly expressed  
414 genes. Additionally, many genes in the genome or pan-genome were likely not expressed in leaf tissue at  
415 the developmental stage assessed herein. However, our results were consistent with prior studies which  
416 found that pan-genome core genes are frequently more highly expressed (Gao et al., 2019; Gordon et al.,  
417 2017; Tao et al., 2021) and therefore more likely to be sampled in RNA-Sequencing libraries (Figure S5).

418 The distribution of pan-gene occupancy varied considerably among modules in both Drought and  
419 Water networks (Table 4a,b; Fig. 3a,b). Most modules in both co-expression networks showed ratios of  
420 shell genes consistent with the genome averages (Fisher's Test; Table 4a,b), with notable exceptions.  
421 Among Drought modules, D8 showed a considerable excess of shell genes (63.2%). Conversely, D2  
422 (10.0%) and D3 (11.2%) each show a deficit of shell genes. Water co-expression modules showed  
423 considerably more variation in pan-gene occupancy. Most large modules in the water network showed  
424 significant deficits of shell genes, though W4 (27.8%), W9 (21.8%), W11 (25.5%), W12 (27.5%), and  
425 W13 (60.0%) had an excess of shell genes relative to the genome averages (note that W11, W12, and  
426 W13 were very small modules with fewer than 60 genes each).

427 To investigate the proportion of putative hub genes in each module that were members of the shell  
428 gene sets, greater departures from genome averages were required to reach statistical significance given  
429 the comparatively small number of these genes (Table 4c,d; Fig. 3c,d). Among the Drought modules, D8  
430 and D9 did not show hub genes whereas other modules showed a predominance (>80%) of core or soft-  
431 core hub genes with the exception of D7, whose four hub genes were shell genes (Table 4c). Among the  
432 Water modules, W9 had a high proportion of shell hub genes (33.3%) as well as W4 and W12 though  
433 these were poorly enriched with hub genes, whereas W7 showed a low percentage of hub shell genes.  
434 Only the shell genes of module W7 are significantly under-represented among the hub genes of the Water  
435 modules, according to the Fisher test (Table 4d).

436 As expected, core and soft-core genes were mostly enriched in the same GO terms as those in their  
437 respective complete modules (Table 2a,b). Similarly, shell genes corresponded to genes involved in the  
438 same biological process as those included in their complete modules. However, the most significant GO  
439 term of the shell genes of D1 was photosynthesis, which was not found to be significant among core  
440 genes. Similarly, the shell genes of D8 were enriched in photosynthesis, nitrogen, amide, and peptide

441 biosynthetic and metabolic processes terms, while core gene sets did not show any significant  
442 enrichments (Table 2a,b and supplementary file S3).

443 We analyzed the pan-genome occupancy of genes with putative CREs in the modules with at least 10  
444 detected genes. These corresponded predominantly to core genes (>50%) in both networks, whereas 7-  
445 22% of the genes with predicted motifs in the Drought network and 0-27.3% in the Water network  
446 corresponded to shell genes (Table 3a,b).

#### 447 **Enrichments of differentially expressed genes with a pan-genomic perspective**

448 72.2%, 17.8% and 10% of the differentially expressed genes with upregulated isoforms in the drought  
449 condition were core, soft-core, and shell genes, respectively. On the other hand, 67.5%, 20.9% and 11.6%  
450 of the genes with downregulated isoforms in the drought condition were core, soft-core, and shell genes,  
451 respectively (Table 5; supplementary file S2). 59.3% of DE isoforms (58.7% of DE genes) and 47.4% DE  
452 isoforms (44.6% DE genes) of Drought (Table S5a) and Water (Table S5b) networks, respectively, were  
453 not assigned to any modules (i.e., they are members of the gray or zero module). Among the hub nodes  
454 (isoforms), 64.4% (56/87) and 34.3% (86/251) of them correspond to DE isoforms of the Drought (Table  
455 S6a) and Water (Table S6b) networks, respectively.

456 Five of the nine Drought co-expression modules had a predominance (>50%) of upregulated DE  
457 isoforms except for the large modules D2 and D3 and the small modules D8 and D9 (Table S5a).  
458 Similarly, among Water modules, only one large module (W4) and three small modules (W10, W11 and  
459 W13) had a predominance of downregulated DE isoforms in the drought condition compared to the water  
460 condition (Table S5b).

461 21 out of the 25 most strongly upregulated genes did not cluster with other genes in the drought co-  
462 expression network (i.e., they were members of the grey D0 module), while the majority of these strongly  
463 upregulated genes did cluster in a module in the water network (Table S7). The 25 most strongly  
464 upregulated genes by drought showed a range of predicted functions which included two predicted  
465 dehydrins (Decena et al. 2021), two ABA-associated proteins, and two lipid transfer proteins (LTPs)  
466 (Table S7). LTPs were among the most highly induced transcripts in an *Arabidopsis thaliana* experiment  
467 that imposed very similar soil drying conditions to those imposed in the present study (Des Marais et al.,  
468 2012). The 25 most strongly downregulated genes showed markedly different patterns than the most  
469 strongly upregulated genes. Most of the genes cluster in D2 and W10, and four of these genes (three  
470 clustered in D2 and one in W10) were hub genes (Table S7). Both of these modules were enriched for



471 genes involved in photosynthesis (Table 2a,b) and the annotations for many of these genes suggested  
472 associations with the light reactions of photosynthesis.

473

## 474 **DISCUSSION**

475 Large scale transcriptome data sets have been used to construct co-expression networks for gene and  
476 gene regulation discovery in model plant systems and crops (Aoki et al, 2007, 2016; Masalia et al., 2017;  
477 Miao et al., 2017). The co-expression network approach allows testing hypotheses on gene functions from  
478 their putative regulatory interactions with other functionally known genes classified in the same modules  
479 (Mochida et al., 2011), and on links between signalling pathways and phenotypic response to  
480 environmental stress (Des Marais et al., 2012). However, the mechanisms of and consequences for  
481 genetic diversity in environmentally responsive gene regulatory networks are less often considered (Sun  
482 & Dinneny, 2018). Our system-level approach allowed us to construct a drought-responsive gene co-  
483 expression network from leaf tissue transcriptome profiles of *B. distachyon* accessions and to identify  
484 modules of putatively co-regulated genes within it. We integrated these network hypotheses with  
485 information about gene presence/absence variation as represented in the *B. distachyon* pan-genome.

### 486 **Regulatory control of *Brachypodium* response to soil drying**

487 *B. distachyon* is an annual species native to seasonally dry environments in the Mediterranean, where  
488 it has likely evolved mechanisms to tolerate short-term soil drying during the growing season as well as  
489 unpredictably timed end-of-season drought (López-Álvarez et al., 2015). Several past studies have  
490 identified mechanisms of response to soil drying comprising transcriptomic, metabolic, physiological, and  
491 developmental plasticity (Bertolini et al., 2013; Chen et al., 2016; Decena et al., 2021; Des Marais, et al.,  
492 2016, 2017b; Fisher et al., 2016; Gordon et al., 2014; Handakumbura et al., 2019; Luo et al., 2011;  
493 Manzaneda et al., 2015; Priest et al., 2014; Ruíz et al., 2016; Verelst et al., 2013), as well as considerable  
494 genetic diversity of response (GxE; Des Marais et al., 2017b; Handakumbura et al., 2019). Priest et al.  
495 (2014) provided the first transcriptomic assessment of response to drying, exposing the Bd21 accession to  
496 a simulated severe drying stress by removing plants from soil to desiccate on a lab benchtop. These  
497 authors observed a strong transcriptional signature of down-regulated photosynthesis, cell division, and  
498 cell growth. Subsequent work imposing a more gradual soil drying stress in Bd21 found the opposite  
499 pattern, directly observing sustained cell division and transcriptomic patterns of altered primary  
500 metabolism, rather than outright downregulation (Verelst et al., 2013). Indeed, studies imposing moderate

501 drying on diverse *B. distachyon* accessions revealed increased leaf mass per area and greater root biomass  
502 in several accessions in response to drying (Des Marais et al., 2017b; Handakumbura et al., 2019), both of  
503 which require considerable investment of carbohydrates. In the present study we do, however, observe  
504 several strongly downregulated genes with annotated functions related to the light reactions of  
505 photosynthesis as well as RuBisCO assembly and function (Table S7).

506 How can we reconcile these transcriptional signatures of reduced photosynthesis with the observation  
507 that carbohydrate-intensive processes like root growth continue under drying? The effects of soil drying  
508 on photosynthesis are complex, and the reduction of internal leaf CO<sub>2</sub> (c<sub>i</sub>) caused by stomatal closure can  
509 affect the redox status of cells (Pinheiro & Chaves, 2011). As the Calvin Cycle reduces available CO<sub>2</sub>, it  
510 is also a strong sink for energy captured by the photosystems. As this sink is lowered by decreased c<sub>i</sub>,  
511 continued high irradiance can lead to increased expression of photoprotective mechanisms and decreased  
512 expression of photochemistry as cells try to protect themselves from excess energy (Demmig-Adams &  
513 Adams, 1996). As a result, studies of soil drying responses often observe decreased activity of the  
514 photosystems and increased expression of, for example, photorespiration or other energy sinks (Wingler  
515 et al., 1999). While we have no direct measurements of photorespiration or the quantum yield of  
516 photosystem II in the current study, our observation of decreased expression of transcripts associated with  
517 photosystem proteins is consistent with these mechanisms.

518 In light of this past evidence for an important role of photosynthesis and primary metabolism in  
519 drying response, we focus here on Drought module 5 (D5). D5 showed a low correlation with the  
520 Consensus modules (Fig. 2a), consistent with the hypothesis that the genes in this module are involved in  
521 regulating plant response to drought stress. Its co-expressed genes, both core and soft-core, are involved  
522 in protein folding, response to heat, temperature, and abiotic stimulus (Table 2a). The four DE hub nodes  
523 (three genes) of D5 were upregulated in the drought condition compared to the water condition (Table S8)  
524 and each of these four hubs is a core gene. Molecular chaperones, especially heat shock proteins (HSPs),  
525 were predominantly annotated in both co-expressed and upregulated DE genes (Table S8). Related to the  
526 presence of chaperones, the annotated DNA motifs concurred with the GO enrichment of the protein  
527 folding and the Heat stress transcription factor B-3 (Table 3a).

## 528 **Topological position of pan-genes**

529 One key conclusion with respect to the evolution of pan-genomes and gene regulation arise from our  
530 analysis. First, pan-genes are non-randomly assorted among co-expression modules in *B. distachyon*. This  
531 observation suggests that the functions conferred by some co-expression modules are likely under

532 stronger purifying selection than those conferred by other modules. These latter modules represent  
533 possible regulatory variation on which natural selection may act. Such a prospect was anticipated by  
534 Wagner and Altenberg when they argued that modularity allows for evolutionary tinkering (Wagner &  
535 Altenberg, 1996). Our results point towards a role for segregating gene copies in generating this modular  
536 variation. This conclusion extends earlier work indicated that low-occupancy genes tend to be enriched  
537 for functional classes of genes putatively involved in local adaptation such as disease resistance and gene  
538 regulation (Gordon et al., 2017).

539 Pleiotropy can have a strong effect on the rate of molecular evolution and on the roles that functional  
540 gene variants might play in evolutionary change. Pleiotropy is often correlated with the position of a gene  
541 or protein in biochemical and gene regulatory networks (Erwin & Davidson, 2009; Jeong et al., 2001),  
542 which are now readily inferred from high dimensional datasets such as the genome-wide gene co-  
543 expression networks studies herein. Here, we considered the case of potentially large-effect mutations –  
544 segregating gene copies identified from a grass pan-genome – and ask whether such “pan-genes” are  
545 unevenly distributed in gene co-expression networks. Focusing on the well-Watered (control)  
546 environment, we find that shell genes – pan-genes found in fewer than 31 of our studied accessions -- are  
547 statistically under-represented among the genes in five of the six largest (in terms of total number of  
548 genes) co-expression modules (Table 4b). These large modules are enriched for GO terms comprising  
549 essential processes such as protein synthesis, primary metabolism, various processes related to  
550 phosphorus metabolism and signalling, and cell wall organization (Table 2b). Moreover, shell genes are  
551 generally under-represented among module hub genes (diagnosed as those whose expression most highly  
552 correlated with the module as a whole, and thus possibly the most topologically connected among genes  
553 in a module) in these five Water modules (Table 4d). Collectively, these results support the hypothesis  
554 that core pan-genome genes are centrally located in gene co-expression networks and involved in  
555 biological processes likely to be under strong purifying selection.

556 Water module 4 (W4), comprising 590 genes, is the only large water module that is statistically  
557 enriched for shell genes (Table 4b). Shell genes in W4 are associated with a range of GO terms including  
558 processes related to photosynthesis (Table 2b). In general, the lists of shell genes in modules do not tend  
559 to have strong GO enrichments, perhaps owing to the relatively small numbers of genes in these lists.  
560 Interestingly, among the Drought modules, the only module for which shell genes do have an enrichment  
561 (D8; Table 4a) includes GO terms associated with photosynthesis (Table 2a). Shell genes represent genes  
562 found in some sampled accessions but missing in others, suggesting that *B. distachyon* may harbor  
563 genetic diversity in molecular pathways related to photosynthesis. Whether these segregating variants

564 represent adaptive genetic diversity reflecting the broad geographical coverage of our sampling, or simply  
565 mildly deleterious copy number variants on their way to being lost will require a larger population  
566 sample. Previously, we demonstrated significant genetic variation among the same *Brachypodium*  
567 accessions used herein for leaf carbon content, leaf C:N ratios, and water use efficiency (WUE; Des  
568 Marais, et al.; 2017b). Among these, WUE was significantly associated with principal components  
569 summarizing climate diversity; it is possible that some of the segregating variation in photosynthesis gene  
570 presence/absence is involved in local adaptation to climate.

571 The co-expression network approach we employed here, in concert with a modern pan-genomic  
572 perspective on segregating genetic variation, allows us to identify subsets of genes involved in core  
573 metabolic processes such as photosynthesis, suggesting possible candidate genes regulating natural  
574 genetic variation in resource assimilation and growth. These genes make attractive targets for further  
575 hypothesis testing via genome editing. Collectively, our work demonstrates the importance of accounting  
576 for both gene copy number variation and regulatory interactions in studying genome function and  
577 evolution.

## 578 **ACKNOWLEDGEMENTS**

579 We thank R. Hopkins, E. Sukamtoh, J. Bonnette, and B. Whitaker for assistance with data collection. This  
580 work was supported by the USDA (NIFA-2011-67012-30663) to D.L.D., NSF (IOS-0922457) to T.E.J.,  
581 the Spanish Ministry of Science and Innovation CGL2016-79790-P and PID2019-108195GB-I00,  
582 University of Zaragoza UZ2016\_TEC02 grant projects to P.C., and the Joint Genome Institute  
583 FP00006675 contract to P.C. and FP00006746 to D.L.D.. R.S. was funded by a Spanish Ministry of  
584 Economy and Competitiveness (Mineco) FPI PhD fellowship, Mineco and Ibercaja-CAI mobility grants  
585 and Instituto de Estudios Altoaragoneses grant. B.C.M. was funded by Fundación ARAID. P.C. and R.S.  
586 were partially funded by a European Social Fund/Spanish Aragón Government Bioflora grant.

587

## 588 **REFERENCES**

- 589 Albert, R., Jeong, H., & Barabási, A.-L. (2000). Error and Attack Tolerance of Complex Networks.  
590 *Nature*, 406, 378–382. doi: 10.1038/35019019
- 591 Alonge, M., Wang, X., Benoit, M., Soyk, S., Pereira, L., Zhang, L., ... Lippman, Z. B. (2020). Major  
592 Impacts of Widespread Structural Variation on Gene Expression and Crop Improvement in Tomato.

- 593 *Cell*, 182(1), 145-161.e23. doi: 10.1016/j.cell.2020.05.021
- 594 Aoki, K., Ogata, Y., & Shibata, D. (2007). Approaches for Extracting Practical Information from Gene  
595 Co-expression Networks in Plant Biology. *Plant Cell Physiology*, 48(3), 381–390. doi:  
596 10.1093/pcp/pcm013
- 597 Aoki, Y., Okamura, Y., Tadaka, S., Kinoshita, K., & Obayashi, T. (2016). ATTED-II in 2016: A Plant  
598 Coexpression Database Towards Lineage-Specific Coexpression. *Plants and Cell Physiology*,  
599 57(1), e5(1-9). doi: 10.1093/pcp/pcv165
- 600 Bayer, P. E., Golicz, A. A., Scheben, A., Batley, J., & Edwards, D. (2020). Plant pan-genomes are the  
601 new reference. *Nature Plants*, 6(8), 914–920. doi: 10.1038/s41477-020-0733-0
- 602 Bechtold, U., Albihlal, W. S., Lawson, T., Fryer, M. J., Sparrow, P. A. C., Richard, F., ... Mullineaux, P.  
603 M. (2013). Arabidopsis HEAT SHOCK TRANSCRIPTION FACTOR1b overexpression  
604 enhances water productivity, resistance to drought, and infection. *Journal of Experimental Botany*,  
605 64(11), 3467–3481. doi: 10.1093/jxb/ert185
- 606 Benfey, P. N., & Mitchell-Olds, T. (2008). From Genotype to Phenotype: Systems Biology Meets Natural  
607 Variation. *Science*, 320, 495–497. doi: 10.1126/science.117.001946
- 608 Bertolini, E., Verelst, W., Horner, D. S., Gianfranceschi, L., Piccolo, V., Inzé, D., ... Mica, E. (2013).  
609 Addressing the role of microRNAs in reprogramming leaf growth during drought stress in  
610 *Brachypodium distachyon*. *Molecular Plant*, 6(2), 423–443. doi: 10.1093/mp/sss160
- 611 Bohnert, H. J., Nelson, D. E., & Jensenayb, R. G. (1995). Adaptations to Environmental Stresses. *The*  
612 *Plant Cell*, 7, 1099–1111.
- 613 Bolger, A. M., Lohse, M., & Usadel, B. (2014). Trimmomatic: A flexible trimmer for Illumina sequence  
614 data. *Bioinformatics*, 30(15), 2114–2120.
- 615 Borah, P., Sharma, E., Kaur, A., Chandel, G., Mohapatra, T., Kapoor, S., & Khurana, J. (2017). Analysis  
616 of drought-responsive signalling network in two contrasting rice cultivars using transcriptome-  
617 based approach. *Scientific Report*, 42131, 1–21. doi: 10.1038/srep42131
- 618 Bray, N. L., Pimentel, H., Melsted, P., & Pachter, L. (2016). Near-optimal probabilistic RNA-seq  
619 quantification. *Nature Biotechnology*, 34(5), 525–527. doi: 10.1038/nbt.3519
- 620 Carlson, M. R. J., Zhang, B., Fang, Z., Mischel, P. S., Horvath, S., & Nelson, S. F. (2006). Gene  
621 connectivity, function, and sequence conservation: predictions from modular yeast co-expression  
622 networks. *BMC Genomics*, 7(40), 1–15. doi: 10.1186/1471-2164-7-40

- 623 Catalán, P., Chalhoub, B., Chochois, V., Garvin, D. F., Hasterok, R., Manzaneda, A. J., ... Voxeur, A.  
624 (2014). Update on the genomics and basic biology of *Brachypodium*. *Trends in Plant Science*,  
625 *19*(7), 414–418. doi: 10.1016/j.tplants.2014.05.002
- 626 Catalán, P., López-Alvarez, D., Díaz-Pérez, A., Sancho, R., & López-Herranz, M. L. (2016). Phylogeny  
627 and Evolution of the Genus *Brachypodium*. In J P Vogel (Ed.), *Genetics and genomics of*  
628 *Brachypodium. Plant Genetics and Genomics: Crops Models* (pp. 9–38). Springer. doi:  
629 10.1007/7397
- 630 Chaves, M. M., Maroco, J. P., & Pereira, J. S. (2003). Understanding plant responses to drought — from  
631 genes to whole plant. *Functional Plant Biology*, *30*, 239–264. doi: 10.1071/FP02076
- 632 Chen, L., Han, J., Deng, X., Tan, S., Li, L., Li, L., ... Zhang, W. (2016). Expansion and stress responses  
633 of AP2/EREBP superfamily in *Brachypodium distachyon*. *Scientific Reports*, *6*(January), 1–14.  
634 doi: 10.1038/srep21623
- 635 Contreras-Moreira, B., Cantalapiedra, C. P., García-Pereira, M. J., Gordon, S. P., Vogel, J. P., Igartua, E.,  
636 ... Vinuesa, P. (2017). Analysis of Plant Pan-Genomes and Transcriptomes with GET \_  
637 HOMOLOGUES-EST, a Clustering Solution for Sequences of the Same Species. *Frontiers in*  
638 *Genetics*, *8*(184), 1–16. doi: 10.3389/fpls.2017.00184
- 639 Decena, M. A., Gálvez-Rojas, S., Agostini, F., Sancho, R., Contreras-Moreira, B., Des Marais, D. L., ...  
640 Catalán, P. (2021). Comparative genomics, evolution, and drought-induced expression of dehydrin  
641 genes in model *Brachypodium* grasses. *Plants*, *10*(2664), 1–29. doi: 10.3390/plants10122664
- 642 Demmig-Adams, B., & Adams, W. W. (1996). The role of xanthophyll cycle carotenoids in the protection  
643 of photosynthesis. *Trends in Plant Science*, *1*(1), 21–26. doi: 10.1016/S1360-1385(96)80019-7
- 644 Des Marais, D. L., Guerrero, R. F., Lasky, J. R., & Scarpino, S. V. (2017a). Topological features of gene  
645 regulatory networks predict patterns of natural diversity in environmental response. *Proceedings of*  
646 *the Royal Society B: Biological Sciences*, *284*(1856). doi: 10.1098/rspb.2017.0914
- 647 Des Marais, D. L., & Juenger, T. E. (2016). *Brachypodium* and the Abiotic Environment. In John P Vogel  
648 (Ed.), *Genetics and genomics of Brachypodium. Plant Genetics and Genomics: Crops Models*,  
649 *volume 18* (pp. 291–311). Switzerland: Springer.
- 650 Des Marais, D. L., Lasky, J. R., Verslues, P. E., Chang, T. Z., & Juenger, T. E. (2017b). Interactive  
651 effects of water limitation and elevated temperature on the physiology, development and fitness of  
652 diverse accessions of *Brachypodium distachyon*. *New Phytologist*, *214*, 132–144. doi:  
653 10.1111/nph.14316

- 654 Des Marais, D. L., McKay, J. K., Richards, J. H., Sen, S., Wayne, T., & Juenger, T. E. (2012).  
655 Physiological Genomics of Response to Soil Drying in Diverse Arabidopsis Accessions. *The Plant*  
656 *Cell*, 24, 893–914. doi: 10.1105/tpc.112.096180
- 657 Des Marais, D. L., Razzaque, S., Hernandez, K. M., Garvin, D. F., & Juenger, T. E. (2016). Quantitative  
658 trait loci associated with natural diversity in water-use efficiency and response to soil drying in  
659 *Brachypodium distachyon*. *Plant Science*, 251, 2–11. doi: 10.1016/j.plantsci.2016.03.010
- 660 Dong, J., & Horvath, S. (2007). Understanding network concepts in modules. *BMC Systems Biology*,  
661 1(24), 1–20. doi: 10.1186/1752-0509-1-24
- 662 Erwin, D. H., & Davidson, E. H. (2009). The evolution of hierarchical gene regulatory networks. *Nature*  
663 *Reviews Genetics*, 10(2), 141–148. doi: 10.1038/nrg2499
- 664 Filiz, E., Ozdemir, B. S., Budak, F., Vogel, J. P., Tuna, M., & Budak, H. (2009). Molecular,  
665 morphological, and cytological analysis of diverse *Brachypodium distachyon* inbred lines. *Genome*,  
666 52(10), 876–890. doi: 10.1139/g09-062
- 667 Fisher, L. H., Han, J., Corke, F. M., Akinyemi, A., Didion, T., Nielsen, K. K., ... Bosch, M. (2016).  
668 Linking Dynamic Phenotyping with Metabolite Analysis to Study Natural Variation in Drought  
669 Responses of *Brachypodium distachyon*. *Frontiers in Plant Science*, 7, 1–15. doi:  
670 10.3389/fpls.2016.01751
- 671 Fisher, R. A. (1930). *The genetical theory of natural selection*. Oxford Clarendon Press. doi:  
672 10.5962/bhl.title.27468
- 673 Gao, L., Gonda, I., Sun, H., Ma, Q., Bao, K., Tieman, D. M., ... Fei, Z. (2019). The tomato pan-genome  
674 uncovers new genes and a rare allele regulating fruit flavor. *Nature Genetics*, 51(6), 1044–1051.  
675 doi: 10.1038/s41588-019-0410-2
- 676 Gibson, G. (2016). On the Evaluation of Module Preservation. *Cell Systems*, 3, 17–19. doi:  
677 10.1016/j.cels.2016.07.009
- 678 Gordon, S. P., Contreras-Moreira, B., Woods, D. P., Des Marais, D. L., Burgess, D., Shu, S., ... Vogel, J.  
679 P. (2017). Extensive gene content variation in the *Brachypodium distachyon* pan-genome correlates  
680 with population structure. *Nature Communications*, 8(2184). doi: 10.1038/s41467-017-02292-8
- 681 Gordon, S. P., Priest, H., Des Marais, D. L., Schackwitz, W., Figueroa, M., Martin, J., ... Vogel, J. P.  
682 (2014). Genome diversity in *Brachypodium distachyon*: Deep sequencing of highly diverse inbred  
683 lines. *The Plant Journal*, 79, 361–374. doi: 10.1111/tpj.12569
- 684 Guelzim, N., Bottani, S., Bourgine, P., & Képès, F. (2002). Topological and causal structure of the yeast

- 685 transcriptional regulatory network. *Nature Genetics*, 31(1), 60–63. doi: 10.1038/ng873
- 686 Guo, M., Liu, J. H., Ma, X., Luo, D. X., Gong, Z. H., & Lu, M. H. (2016). The plant heat stress  
687 transcription factors (HSFs): Structure, regulation, and function in response to abiotic stresses.  
688 *Frontiers in Plant Science*, 7(FEB2016). doi: 10.3389/fpls.2016.00114
- 689 Haberer, G., Kamal, N., Bauer, E., Gundlach, H., Fischer, I., Seidel, M. A., ... Mayer, K. F. X. (2020).  
690 European maize genomes highlight intraspecies variation in repeat and gene content. *Nature*  
691 *Genetics*, 52(9), 950–957. doi: 10.1038/s41588-020-0671-9
- 692 Handakumbura, P. P., Stanfill, B., Rivas-Ubach, A., Fortin, D., Vogel, J. P., & Jansson, C. (2019).  
693 Metabotyping as a Stopover in Genome-to-Phenome Mapping. *Scientific Reports*, 9(1), 1–12. doi:  
694 10.1038/s41598-019-38483-0
- 695 Hasterok, R., P. Catalan, S. P. Hazen, A. C. Roulin, J. P. Vogel, K. Wang and L. A. J. Mur (2022).  
696 "Brachypodium: Twenty years as a grass biology model system; the way forward?" *Trends in Plant Science*.
- 697 Hayano-Kanashiro, C., Calderón-Vázquez, C., Ibarra-Laclette, E., Herrera-Estrella, L., & Simpson, J.  
698 (2009). Analysis of Gene Expression and Physiological Responses in Three Mexican Maize  
699 Landraces under Drought Stress and Recovery Irrigation. *PLoS ONE*, 4(10), e7531. doi:  
700 10.1371/journal.pone.0007531
- 701 Howe, K. L., Contreras-Moreira, B., De Silva, N., Maslen, G., Akanni, W., Allen, J., ... Flicek, P. (2020).  
702 Ensembl Genomes 2020-enabling non-vertebrate genomic research. *Nucleic Acids Research*,  
703 48(D1), D689–D695. doi: 10.1093/nar/gkz890
- 704 Hübner, S., Bercovich, N., Todesco, M., Mandel, J. R., Odenheimer, J., Ziegler, E., ... Rieseberg, L. H.  
705 (2019). Sunflower pan-genome analysis shows that hybridization altered gene content and disease  
706 resistance. *Nature Plants*, 5(1), 54–62. doi: 10.1038/s41477-018-0329-0
- 707 IBI. (2010). Genome sequencing and analysis of the model grass *Brachypodium distachyon*. *Nature*, 463,  
708 763–768. doi: 10.1038/nature08747
- 709 Janiak, A., Kwa, M., & Szarejko, I. (2015). Gene expression regulation in roots under drought. *Journal of*  
710 *Experimental Botany*, 67(4), 1003–1014. doi: 10.1093/jxb/erv512
- 711 Jeong, H., Mason, S. P., Barabási, A. L., & Oltvai, Z. N. (2001). Lethality and centrality in protein  
712 networks. *Nature*, 411(6833), 41–42. doi: 10.1038/35075138
- 713 Juenger, T. E. (2013). Natural variation and genetic constraints on drought tolerance. *Current Opinion in*  
714 *Plant Biology*, 16(3), 274–281. doi: 10.1016/j.pbi.2013.02.001



- 715 Kaas, R. S., C. Friis, D. W. Ussery and F. M. Aarestrup (2012). "Estimating variation within the genes and  
716 inferring the phylogeny of 186 sequenced diverse *Escherichia coli* genomes." *BMC Genomics* **13**(577):  
717 10.1186/1471-2164-1113-1577.
- 718 Koonin, E. V., & Wolf, Y. I. (2008). Genomics of bacteria and archaea: The emerging dynamic view of  
719 the prokaryotic world. *Nucleic Acids Research*, *36*(21), 6688–6719. doi: 10.1093/nar/gkn668
- 720 Ksouri, N., Castro-Mondragón, J. A., Montardit-Tarda, F., van Helden, J., Contreras-Moreira, B., &  
721 Gogorcena, Y. (2021). Tuning promoter boundaries improves regulatory motif discovery in  
722 nonmodel plants: the peach example. *Plant Physiology*, *185*(3), 1242–1258. doi:  
723 10.1093/plphys/kiaa091
- 724 Langfelder, P., & Horvath, S. (2007). Eigengene networks for studying the relationships between co-  
725 expression modules. *BMC Systems Biology*, *1*, 54. doi: 10.1186/1752-0509-1-54
- 726 Langfelder, P., & Horvath, S. (2008). WGCNA: an R package for weighted correlation network analysis.  
727 *BMC Bioinformatics*, *9*(559), 1–13. doi: 10.1186/1471-2105-9-559
- 728 Langfelder, P., & Horvath, S. (2010). Overview of network terminology. Retrieved April 16, 2016, from  
729 [https://labs.genetics.ucla.edu/horvath/CoexpressionNetwork/ModulePreservation/Tutorials/glossary](https://labs.genetics.ucla.edu/horvath/CoexpressionNetwork/ModulePreservation/Tutorials/glossaryTable.pdf)  
730 [Table.pdf](https://labs.genetics.ucla.edu/horvath/CoexpressionNetwork/ModulePreservation/Tutorials/glossaryTable.pdf)
- 731 Langfelder, P., Luo, R., Oldham, M. C., & Horvath, S. (2011). Is my network module preserved and  
732 reproducible? *PLoS Computational Biology*, *7*(1). doi: 10.1371/journal.pcbi.1001057
- 733 Lehti-Shiu, M. D., & Shiu, S. H. (2012). Diversity, classification and function of the plant protein kinase  
734 superfamily. *Philosophical Transactions of the Royal Society B: Biological Sciences*, *367*(1602),  
735 2619–2639. doi: 10.1098/rstb.2012.0003
- 736 Lei, L., Goltsman, E., Goodstein, D., Wu, G. A., Rokhsar, D. S., & Vogel, J. P. (2021). Plant Pan-  
737 Genomics Comes of Age. *Annual Review of Plant Biology*, *72*(1), 411–435. doi: 10.1146/annurev-  
738 arplant-080720-105454
- 739 López-Álvarez, D., Manzaneda, A. J., Rey, P. J., Giraldo, P., Benavente, E., Allainguillaume, J., ...  
740 Catalan, P. (2015). Environmental niche variation and evolutionary diversification of the  
741 *Brachypodium distachyon* grass complex species in their native circum-Mediterranean range.  
742 *American Journal of Botany*, *102*(7), 1073–1088. doi: 10.3732/ajb.1500128
- 743 Luo, N., Liu, J., Yu, X., & Jiang, Y. (2011). Natural variation of drought response in *Brachypodium*  
744 *distachyon*. *Physiologia Plantarum*, *141*(1), 19–29. doi: 10.1111/j.1399-3054.2010.01413.x
- 745 Manzaneda, A. J., Rey, P. J., Anderson, J. T., Raskin, E., Weiss-Lehman, C., & Mitchell-Olds, T. (2015).

- 746 Natural variation, differentiation, and genetic trade-offs of ecophysiological traits in response to  
747 water limitation in *Brachypodium distachyon* and its descendent allotetraploid *B. hybridum*  
748 (Poaceae). *Evolution*, 69(10), 2689–2704. doi: 10.1111/evo.12776
- 749 Manzaneda, A. J., Rey, P. J., Bastida, J. M., Weiss-Lehman, C., Raskin, E., & Mitchell-Olds, T. (2012).  
750 Environmental aridity is associated with cytotype segregation and polyploidy occurrence in  
751 *Brachypodium distachyon* (Poaceae). *New Phytologist*, 193(3), 797–805. doi: 10.1111/j.1469-  
752 8137.2011.03988.x
- 753 Mao, L., Hemert, J. L. Van, Dash, S., & Dickerson, J. A. (2009). Arabidopsis gene co-expression network  
754 and its functional modules. *BMC Bioinformatics*, 10(346), 1–24. doi: 10.1186/1471-2105-10-346
- 755 Martínez, L. M., Fernández-ocaña, A., Rey, P. J., Salido, T., Amil-rui, F., & Manzaneda, A. J. (2018).  
756 Variation in functional responses to water stress and differentiation between natural allopolyploid  
757 populations in the *Brachypodium distachyon* species complex. *Annals of Botany*, 00, 1–14. doi:  
758 10.1093/aob/mcy037
- 759 Masalia, R. R., Bewick, A. J., & Burke, J. M. (2017). Connectivity in gene coexpression networks  
760 negatively correlates with rates of molecular evolution in flowering plants. *PLoS ONE*, 12(7),  
761 e0182289. doi: <https://doi.org/10.1371/journal.pone.0182289>
- 762 Meyer, E., Aglyamova, G. V., & Matz, M. V. (2011). Profiling gene expression responses of coral larvae  
763 (*Acropora millepora*) to elevated temperature and settlement inducers using a novel RNA-Seq  
764 procedure. *Molecular Ecology*, 20(17), 3599–3616. doi: 10.1111/j.1365-294X.2011.05205.x
- 765 Mi, H., Ebert, D., Muruganujan, A., Mills, C., Albu, L. P., Mushayamaha, T., & Thomas, P. D. (2021).  
766 PANTHER version 16: A revised family classification, tree-based classification tool, enhancer  
767 regions and extensive API. *Nucleic Acids Research*, 49(D1), D394–D403. doi:  
768 10.1093/nar/gkaa1106
- 769 Miao, Z., Han, Z., Zhang, T., Chen, S., & Ma, C. (2017). A systems approach to a spatio-temporal  
770 understanding of the drought stress response in maize. *Scientific Reports*, 7(6590), 1–14. doi:  
771 10.1038/s41598-017-06929-y
- 772 Mochida, K., Uehara-Yamaguchi, Y., Yoshida, T., Sakurai, T., & Shinozaki, K. (2011). Global  
773 Landscape of a Co-Expressed Gene Network in Barley and its Application to Gene Discovery in  
774 Triticeae Crops. *Plants and Cell Physiology*, 52(5), 785–803. doi: 10.1093/pcp/pcr035
- 775 Monroe, J. G., H. Cai and D. L. Des Marais (2021). "Diversity in non-linear responses to soil moisture shapes  
776 evolutionary constraints in *Brachypodium*." *G3* 11(12): jkab334.

- 777 Monroe, J. G., McGovern, C., Lasky, J. R., Grogan, K., Beck, J., & McKay, J. K. (2016). Adaptation to  
778 warmer climates by parallel functional evolution of CBF genes in *Arabidopsis thaliana*. *Molecular*  
779 *Ecology*, *25*(15), 3632–3644. doi: 10.1111/mec.13711
- 780 Monroe, J. G., Powell, T., Price, N., Mullen, J. L., Howard, A., Evans, K., ... McKay, J. K. (2018).  
781 Drought adaptation in *Arabidopsis thaliana* by extensive genetic loss-of-function. *eLife*, *7*, 1–18.  
782 doi: 10.7554/eLife.41038
- 783 Mur, L. A. J., Allainguillaume, J., Catalán, P., Hasterok, R., Jenkins, G., Lesniewska, K., ... Vogel, J.  
784 (2011). Exploiting the Brachypodium tool box in cereal and grass research. *New Phytologist*,  
785 *191*(2), 334–347. doi: 10.1111/j.1469-8137.2011.03748.x
- 786 Nakashima, K., Ito, Y., & Yamaguchi-Shinozaki, K. (2009). Transcriptional Regulatory Networks in  
787 Response to Abiotic Stresses in *Arabidopsis* and Grasses. *Plant Physiology*, *149*, 88–95. doi:  
788 10.1104/pp.108.129791
- 789 Nakashima, K., Yamaguchi-Shinozaki, K., & Shinozaki, K. (2014). The transcriptional regulatory  
790 network in the drought response and its crosstalk in abiotic stress responses including drought, cold,  
791 and heat. *Frontiers in Plant Science*, *5*(170), 1–7. doi: 10.3389/fpls.2014.00170
- 792 Nover, L., Bharti, K., Döring, P., Mishra, S. K., Ganguli, A., & Scharf, K. D. (2001). *Arabidopsis* and the  
793 heat stress transcription factor world: How many heat stress transcription factors do we need? *Cell*  
794 *Stress and Chaperones*, *6*(3), 177–189. doi: 10.1379/1466-1268(2001)006<0177:aathst>2.0.co;2
- 795 Paaby, A. B., & Rockman, M. V. (2014). Cryptic genetic variation: Evolution’s hidden substrate. *Nature*  
796 *Reviews Genetics*, *15*(4), 247–258. doi: 10.1038/nrg3688
- 797 Pimentel, H., Bray, N. L., Puente, S., Melsted, P., & Pachter, L. (2017). Differential analysis of RNA-seq  
798 incorporating quantification uncertainty. *Nature Methods*, *14*(7), 687–690. doi:  
799 10.1038/nmeth.4324
- 800 Pinheiro, C., & Chaves, M. M. (2011). Photosynthesis and drought: Can we make metabolic connections  
801 from available data? *Journal of Experimental Botany*, *62*(3), 869–882. doi: 10.1093/jxb/erq340
- 802 Porth, I., Klápště, J., McKown, A. D., La Mantia, J., Hamelin, R. C., Skyba, O., ... Douglas, C. J. (2014).  
803 Extensive functional pleiotropy of REVOLUTA substantiated through forward genetics. *Plant*  
804 *Physiology*, *164*(2), 548–554. doi: 10.1104/pp.113.228783
- 805 Priest, H. D., Fox, S. E., Rowley, E. R., Murray, J. R., Michael, T. P., & Mockler, T. C. (2014). Analysis  
806 of Global Gene Expression in *Brachypodium distachyon* Reveals Extensive Network Plasticity in  
807 Response to Abiotic Stress. *PLoS ONE*, *9*(1), e87499. doi: 10.1371/journal.pone.0087499

- 808 R Core Team. (2022). *R: A language and environment for statistical computing*. R Foundation for  
809 *Statistical Computing*. Vienna, Austria.
- 810 Ritchie, S. C., Watts, S., Fearnley, L. G., Holt, K. E., Abraham, G., & Inouye, M. (2016). A Scalable  
811 Permutation Approach Reveals Replication and Preservation Patterns of Network Modules in Large  
812 Datasets. *Cell Systems*, 3, 71–82. doi: 10.1016/j.cels.2016.06.012
- 813 Ruíz, M., Quemada, M., García, R. M., Carrillo, J. M., & Benavente, E. (2016). Use of thermographic  
814 imaging to screen for drought-tolerant genotypes in *Brachypodium distachyon*. *Crop and Pasture  
815 Science*, 67(1), 99–108. doi: 10.1071/CP15134
- 816 Scharf, K. D., Berberich, T., Ebersberger, I., & Nover, L. (2012). The plant heat stress transcription factor  
817 (Hsf) family: Structure, function and evolution. *Biochimica et Biophysica Acta - Gene Regulatory  
818 Mechanisms*, 1819(2), 104–119. doi: 10.1016/j.bbagr.2011.10.002
- 819 Scholthof, K.-B. G., Irigoyen, S., Catalán, P., & Mandadi, K. K. (2018). *Brachypodium*: A monocot grass  
820 model system for plant biology. *Plant Cell*, 30, 1673–1694.
- 821 Sebastian, A., & Contreras-Moreira, B. (2014). footprintDB: a database of transcription factors with  
822 annotated cis elements and binding interfaces. *Bioinformatics*, 30(2), 258–265. doi:  
823 10.1093/bioinformatics/btt663
- 824 Skalska, A., Stritt, C., Wyler, M., Williams, H. W., Vickers, M., Han, J., ... Mur, L. A. J. (2020). Genetic  
825 and methylome variation in Turkish *Brachypodium distachyon* accessions differentiate two  
826 geographically distinct subpopulations. *International Journal of Molecular Sciences*, 21(18), 1–17.  
827 doi: 10.3390/ijms21186700
- 828 Stuart, J. M., Segal, E., Koller, D., & Kim, S. K. (2003). A Gene Coexpression Network for Global  
829 Discovery of Conserved Genetic Modules. *Science*, 302, 249–255.
- 830 Sun, Y., & Dinneny, J. R. (2018). Q&A: How do gene regulatory networks control environmental  
831 responses in plants? *BMC Biology*, 16(38), 18–21. doi: 10.1186/s12915-018-0506-7
- 832 Tandonnet, S., & Torres, T. T. (2017). Traditional versus 3' RNA-seq in a non-model species. *Genomics  
833 Data*, 11, 9–16. doi: 10.1016/j.gdata.2016.11.002
- 834 Tao, Y., Luo, H., Xu, J., Cruickshank, A., Zhao, X., Teng, F., ... Mace, E. (2021). Extensive variation  
835 within the pan-genome of cultivated and wild sorghum. *Nature Plants*, 7(6), 766–773. doi:  
836 10.1038/s41477-021-00925-x
- 837 Thomas-Chollier, M., Herrmann, C., Defrance, M., Sand, O., Thieffry, D., & Van Helden, J. (2012).  
838 RSAT peak-motifs: Motif analysis in full-size CHIP-seq datasets. *Nucleic Acids Research*, 40(4).

- 839 doi: 10.1093/nar/gkr1104
- 840 Turatsinze, J. V., Thomas-Chollier, M., Defrance, M., & van Helden, J. (2008). Using RSAT to scan  
841 genome sequences for transcription factor binding sites and cis-regulatory modules. *Nature*  
842 *Protocols*, 3(10), 1578–1588. doi: 10.1038/nprot.2008.97
- 843 Verelst, W., Bertolini, E., De Bodt, S., Vandepoele, K., Demeulenaere, M., Pè, M. E., & Inzé, D. (2013).  
844 Molecular and physiological analysis of growth-limiting drought stress in *Brachypodium*  
845 *distachyon* leaves. *Molecular Plant*, 6(2), 311–322. doi: 10.1093/mp/sss098
- 846 Vogel, John P., Garvin, D. F., Leong, O. M., & Hayden, D. M. (2006). *Agrobacterium*-mediated  
847 transformation and inbred line development in the model grass *Brachypodium distachyon*. *Plant*  
848 *Cell, Tissue and Organ Culture*, 84(2), 199–211. doi: 10.1007/s11240-005-9023-9
- 849 Vogel, John P., Garvin, D. F., Mockler, T. C., Schmutz, J., Rokhsar, D., Bevan, M. W., ... Baxter, I.  
850 (2010). Genome sequencing and analysis of the model grass *Brachypodium distachyon*. *Nature*,  
851 463(7282), 763–768. doi: 10.1038/nature08747
- 852 Vogel, John P., Tuna, M., Budak, H., Huo, N., Gu, Y. Q., & Steinwand, M. A. (2009). Development of  
853 SSR markers and analysis of diversity in Turkish populations of *Brachypodium distachyon*. *BMC*  
854 *Plant Biology*, 9, 88. doi: 10.1186/1471-2229-9-88
- 855 Wagner, G. P., & Altenberg, L. (1996). PERSPECTIVE: COMPLEX ADAPTATIONS AND THE  
856 EVOLUTION OF EVOLVABILITY. *Evolution*, 50(3), 967–976. doi: 10.1111/j.1558-  
857 5646.1996.tb02339.x
- 858 Wingler, A., Quick, W. P., Bungard, R. A., Bailey, K. J., Lea, P. J., & Leegood, R. C. (1999). The role of  
859 photorespiration during drought stress: An analysis utilizing barley mutants with reduced activities  
860 of photorespiratory enzymes. *Plant, Cell and Environment*, 22(4), 361–373. doi: 10.1046/j.1365-  
861 3040.1999.00410.x
- 862 Wolfe, C. J., Kohane, I. S., & Butte, A. J. (2005). Systematic survey reveals general applicability of  
863 “guilt-by-association” within gene coexpression networks. *BMC Bioinformatics*, 6(227), 1–10. doi:  
864 10.1186/1471-2105-6-227
- 865 Zhang, B., & Horvath, S. (2005). A General Framework for Weighted Gene Co-expression Network  
866 Analysis. *Statistical Applications in Genetics and Molecular Biology*, 4(1), Article 17.
- 867 Zheng, Y., Jiao, C., Sun, H., Rosli, H. G., Pombo, M. A., Zhang, P., ... Fei, Z. (2016). iTAK: A Program  
868 for Genome-wide Prediction and Classification of Plant Transcription Factors, Transcriptional  
869 Regulators, and Protein Kinases. *Molecular Plant*, 9(12), 1667–1670. doi:

870 10.1016/j.molp.2016.09.014

871

872 **DATA ACCESSIBILITY AND BENEFIT-SHARING**

873 Data Accessibility

874 RNA Sequence data are available at the ENA (European Nucleotide Archive; <https://www.ebi.ac.uk/ena>)  
875 with the consecutive accession numbers from ERR6133302 to ERR6133575.

876 All the R scripts, supplementary Excel files, TPM counts and adjacency matrices are available in the  
877 Github repository identified by the following doi: xxxxxxxxxx created using Zenodo.

878 Experimental details and metadata for samples studied herein were reported previously (Des Marais et al.  
879 2017b).

880 Benefit Sharing

881 All accessions used in the current study originated from collections generated by the *Brachypodium*  
882 research community over several decades. Benefits from this research accrue from the sharing of our data  
883 and results on public databases as described above.

884

885 **AUTHOR CONTRIBUTION**

886 D.L.D. and T.E.J. designed the research. D.L.D. performed the experimental manipulations and generated  
887 the data. D.L.D., R.S., and B.C.-M. performed the analyses. D.L.D. and R.S. wrote the primary draft of  
888 the manuscript, and all authors contributed to the final draft of the manuscript.

889

890 **TABLES**

891 **Table 1.** Statistics of the number and percentage of isoforms (all and hub isoforms) and genes (all and  
 892 hub genes), and mean  $k_{diff}$  (the difference between intra- and inter-modular connectivity) per module for  
 893 each Drought **(a)** and Water **(b)** co-expression networks. The quantity of total counts of genes in drought  
 894 and water networks is different because we counted the genes for each module independently. When  
 895 several isoforms of the same gene were clustered in different modules, the gene was counted multiple  
 896 times; however, it was counted only once if it clustered in the same module. For example, if D1 has three  
 897 isoforms (Bradi1g10000.1, Bradi1g10000.2 and Bradi1g10000.3) of the same gene, it was counted only  
 898 once (Bradi1g10000); when isoforms were found in different modules (e.g., Bradi1g10000.1 in D1,  
 899 Bradi1g10000.2 in D2, Bradi1g10000.3 in D3), the gene was counted three times.

900 **(a)**

| Drought modules                                            | isoforms (nodes) per module |                  | genes per module  |                  | mean $K_{diff}$   |      |
|------------------------------------------------------------|-----------------------------|------------------|-------------------|------------------|-------------------|------|
|                                                            | all                         | hub<br>(KME>0.9) | all               | hub<br>(KME>0.9) |                   |      |
| D0                                                         | Gray                        | 11366 (69.4%)    | nd                | 8313 (67.4%)     | nd                |      |
| D1                                                         | Turquoise                   | 2477 (15.1%)     | 4 (0.16%)         | 1986 (16.1%)     | 3 (0.15%)         | 7.9  |
| D2                                                         | Blue                        | 979 (6.0%)       | 20 (2.04%)        | 750 (6.1%)       | 13 (1.73%)        | 3.7  |
| D3                                                         | Brown                       | 750 (4.6%)       | 41 (5.47%)        | 627 (5.1%)       | 38 (6.06%)        | 10.1 |
| D4                                                         | Yellow                      | 318 (1.9%)       | 4 (1.26%)         | 258 (2.1%)       | 4 (1.55%)         | 3.7  |
| D5                                                         | Green                       | 214 (1.3%)       | 4 (1.87%)         | 169 (1.4%)       | 3 (1.78%)         | 0.8  |
| D6                                                         | Red                         | 111 (0.7%)       | 10 (9.01%)        | 95 (0.8%)        | 7 (7.37%)         | -1.5 |
| D7                                                         | Black                       | 68 (0.4%)        | 4 (5.88%)         | 48 (0.4%)        | 4 (8.3%)          | -0.2 |
| D8                                                         | Pink                        | 65 (0.4%)        | 0 (0%)            | 57 (0.5%)        | 0 (0%)            | -5.9 |
| D9                                                         | Magenta                     | 38 (0.2%)        | 0 (0%)            | 27 (0.2%)        | 0 (0%)            | -8.8 |
| <b>Total counts</b>                                        |                             | <b>16386</b>     | <b>87 (0.53%)</b> | <b>12330</b>     | <b>72 (0.58%)</b> |      |
| <b>Total unique counts</b>                                 |                             | <b>16386</b>     | <b>87 (0.53%)</b> | <b>12137</b>     | <b>72 (0.59%)</b> |      |
| <b>Total unique counts<br/>(excluding gray<br/>module)</b> |                             | <b>5020</b>      | <b>87 (1.73%)</b> | <b>4006</b>      | <b>72 (1.80%)</b> |      |

901

902

903

904

905

906

907

908

909 (b)

| Water modules                                      | isoforms (nodes) per module |               | genes per module   |               | mean Kdiff         |      |
|----------------------------------------------------|-----------------------------|---------------|--------------------|---------------|--------------------|------|
|                                                    | all                         | hub (KME>0.9) | all                | hub (KME>0.9) |                    |      |
| W0                                                 | Gray                        | 9675 (59.0%)  | nd                 | 6934 (56.0%)  | nd                 |      |
| W1                                                 | Turquoise                   | 1866 (11.4%)  | 149 (7.98%)        | 1439 (11.6%)  | 115 (7.99%)        | 26.8 |
| W2                                                 | Blue                        | 870 (5.3%)    | 4 (0.46%)          | 727 (5.9%)    | 3 (0.41%)          | -3.7 |
| W3                                                 | Brown                       | 827 (5.0%)    | 2 (0.24%)          | 696 (5.6%)    | 1 (0.14%)          | 0.3  |
| W4                                                 | Yellow                      | 701 (4.3%)    | 2 (0.29%)          | 590 (4.8%)    | 2 (0.34%)          | -0.7 |
| W5                                                 | Green                       | 607 (3.7%)    | 12 (1.98%)         | 509 (4.1%)    | 10 (1.96%)         | 3.1  |
| W6                                                 | Red                         | 435 (2.7%)    | 9 (2.07%)          | 358 (2.9%)    | 8 (2.08%)          | 2.1  |
| W7                                                 | Black                       | 390 (2.4%)    | 26 (6.67%)         | 313 (2.5%)    | 23 (7.35%)         | 4.6  |
| W8                                                 | Pink                        | 288 (1.7%)    | 2 (0.69%)          | 245 (2.0%)    | 2 (0.82%)          | -2.2 |
| W9                                                 | Magenta                     | 282 (1.7%)    | 22 (7.80)          | 239 (1.9%)    | 21 (8.79%)         | 5.8  |
| W10                                                | Purple                      | 246 (1.5%)    | 5 (2.03%)          | 185 (1.5%)    | 2 (1.08%)          | -1.4 |
| W11                                                | Greenyellow                 | 89 (0.5%)     | 8 (8.99%)          | 55 (0.4%)     | 1 (1.81%)          | -3.1 |
| W12                                                | Tan                         | 62 (0.4%)     | 1 (1.61%)          | 51 (0.4%)     | 1 (1.96%)          | -0.9 |
| W13                                                | Salmon                      | 48 (0.3%)     | 9 (18.75%)         | 40 (0.3%)     | 1 (2.5%)           | -1.6 |
| <b>Total counts</b>                                |                             | <b>16386</b>  | <b>251 (1.53%)</b> | <b>12381</b>  | <b>190 (1.53%)</b> |      |
| <b>Total unique counts</b>                         |                             | <b>16386</b>  | <b>251 (1.53%)</b> | <b>12137</b>  | <b>190 (1.57%)</b> |      |
| <b>Total unique counts (excluding gray module)</b> |                             | <b>6711</b>   | <b>251 (3.74%)</b> | <b>5407</b>   | <b>190 (3.51%)</b> |      |

910

911



**Table 2.** Summary of the enrichment analysis according to the statistically significant GO biological process for the genes (all, core, soft-core and shell genes) clustered in the Drought (D) (a) and Water (W) (b) modules applying the statistical overrepresentation test of Panther (<http://pantherdb.org/>) tool. The biological processes are summarized according to the lowest False Discovery Rate (FDR) values (see Supplementary file S3).

(a)

| Modules | All genes        | core genes                                                                        | soft-core genes                                                                   | Shell genes                                                                      |
|---------|------------------|-----------------------------------------------------------------------------------|-----------------------------------------------------------------------------------|----------------------------------------------------------------------------------|
| D1      | <b>turquoise</b> | nitrogen, amide and peptide metabolic and biosynthetic processes                  | nitrogen, amide and peptide metabolic and biosynthetic processes                  | photosynthesis, nitrogen, amide and peptide metabolic and biosynthetic processes |
| D2      | <b>blue</b>      | photosynthesis                                                                    | photosynthesis                                                                    | <i>No statistically significant terms</i>                                        |
| D3      | <b>brown</b>     | organonitrogen compound metabolic process, location/transport and phosphorylation | organonitrogen compound metabolic process, location/transport and phosphorylation | <i>No statistically significant terms</i>                                        |
| D4      | <b>yellow</b>    | nucleobase-containing compound, heterocycle and nucleic acid metabolic processes  | <i>No statistically significant terms</i>                                         | <i>No statistically significant terms</i>                                        |
| D5      | <b>green</b>     | protein folding, response to heat, temperature and abiotic stimulus               | protein folding, response to heat, temperature and abiotic stimulus               | response to heat, temperature, and protein folding                               |
| D6      | <b>red</b>       | lipid and small molecule metabolic process                                        | lipid and small molecule metabolic process                                        | <i>No statistically significant terms</i>                                        |
| D7      | <b>black</b>     | <i>No statistically significant terms</i>                                         | <i>No statistically significant terms</i>                                         | <i>No statistically significant terms</i>                                        |
| D8      | <b>pink</b>      | photosynthesis, nitrogen, amide and peptide biosynthetic and metabolic processes  | <i>No statistically significant terms</i>                                         | <i>No statistically significant terms</i>                                        |
| D9      | <b>magenta</b>   | <i>No statistically significant terms</i>                                         | <i>No statistically significant terms</i>                                         | <i>No statistically significant terms</i>                                        |

(b)

| Modules | All genes        | core genes                                                                                                                                                            | soft-core genes                                                                                                                           | Shell genes                                                               |                                                                                                                                                                       |
|---------|------------------|-----------------------------------------------------------------------------------------------------------------------------------------------------------------------|-------------------------------------------------------------------------------------------------------------------------------------------|---------------------------------------------------------------------------|-----------------------------------------------------------------------------------------------------------------------------------------------------------------------|
| W1      | <b>turquoise</b> | nitrogen compound, organic substance, primary metabolic processes                                                                                                     | nitrogen compound, organic substance, primary metabolic processes                                                                         | protein ubiquitination, protein modification by small protein conjugation | <i>No statistically significant terms</i>                                                                                                                             |
| W2      | <b>blue</b>      | peptide, amide and nitrogen biosynthetic and metabolic processes                                                                                                      | peptide, amide and nitrogen biosynthetic and metabolic processes                                                                          | peptide, amide and nitrogen biosynthetic and metabolic processes          | peptide, amide and nitrogen biosynthetic and metabolic processes                                                                                                      |
| W3      | <b>brown</b>     | protein, peptide, amide and ion transport/location                                                                                                                    | protein, peptide, amide and ion transport/location                                                                                        | protein and ion transport/location                                        | <i>No statistically significant terms</i>                                                                                                                             |
| W4      | <b>yellow</b>    | photosynthesis, generation of precursor metabolites and energy, cellular nitrogen compound and organic substance biosynthetic processes, and electron transport chain | organic substance, primary, nitrogen compound, nucleobase-containing compound metabolic processes                                         | <i>No statistically significant terms</i>                                 | photosynthesis, generation of precursor metabolites and energy, cellular nitrogen compound and organic substance biosynthetic processes, and electron transport chain |
| W5      | <b>green</b>     | organonitrogen and phosphate-containing compounds, and phosphorus metabolic processes and protein phosphorylation                                                     | organonitrogen and phosphate-containing compounds, small molecule, protein and phosphorus metabolic processes and protein phosphorylation | <i>No statistically significant terms</i>                                 | <i>No statistically significant terms</i>                                                                                                                             |
| W6      | <b>red</b>       | plant-type cell wall organization or biogenesis                                                                                                                       | plant-type cell wall organization or biogenesis                                                                                           | <i>No statistically significant terms</i>                                 | <i>No statistically significant terms</i>                                                                                                                             |
| W7      | <b>black</b>     | glutathione, cellular amino acid, oxoacid, organic acid and sulfur compound metabolic processes                                                                       | glutathione, cellular amino acid, oxoacid, organic acid and sulfur compound metabolic processes                                           | <i>No statistically significant terms</i>                                 | <i>No statistically significant terms</i>                                                                                                                             |

|            |                    |                                                                                                                                                 |                                                                                                                           |                                                                                                                                                 |                                                                                     |
|------------|--------------------|-------------------------------------------------------------------------------------------------------------------------------------------------|---------------------------------------------------------------------------------------------------------------------------|-------------------------------------------------------------------------------------------------------------------------------------------------|-------------------------------------------------------------------------------------|
| <b>W8</b>  | <b>pink</b>        | small molecule, starch, proline and carbohydrate metabolic processes                                                                            | small molecule, starch, proline and carbohydrate metabolic processes<br>cellular protein                                  | <i>No statistically significant terms</i>                                                                                                       | <i>No statistically significant terms</i>                                           |
| <b>W9</b>  | <b>magenta</b>     | regulation of nucleic acid-templated transcription, and RNA, nucleobase-containing compound, macromolecule biosynthesis and metabolic processes | modification protein<br>dephosphorylation, protein modification process, macromolecule modification and dephosphorylation | regulation of nucleic acid-templated transcription, and RNA, nucleobase-containing compound, macromolecule biosynthesis and metabolic processes | <i>No statistically significant terms</i>                                           |
| <b>W10</b> | <b>purple</b>      | photosynthesis                                                                                                                                  | photosynthesis                                                                                                            | photosynthesis                                                                                                                                  | <i>No statistically significant terms</i>                                           |
| <b>W11</b> | <b>greenyellow</b> | <i>No statistically significant terms</i>                                                                                                       | <i>No statistically significant terms</i>                                                                                 | <i>No statistically significant terms</i>                                                                                                       | <i>No statistically significant terms</i>                                           |
| <b>W12</b> | <b>tan</b>         | <i>No statistically significant terms</i>                                                                                                       | <i>No statistically significant terms</i>                                                                                 | <i>No statistically significant terms</i>                                                                                                       | <i>No statistically significant terms</i>                                           |
| <b>W13</b> | <b>salmon</b>      | macromolecule, cellular nitrogen compound, peptide and amide biosynthetic processes                                                             | <i>No statistically significant terms</i>                                                                                 | <i>No statistically significant terms</i>                                                                                                       | macromolecule, cellular nitrogen compound, peptide and amide biosynthetic processes |

---

**Table 3.** DNA motifs and cis-regulatory elements (CREs) of co-expressed genes assigned to Drought (D) (a) and Water (W) (b) modules.

Modules (numeric and color codes of the modules); Accession (footprintDB), Names (gene name); Consensus sequence of motif; Protein name (Swissprot); Ncor (normalized correlation score); e-value; sites (number of sites used to compile the DNA motif); Proportion of genes with CREs per module as detected by matrix-scan in -500 to +200 bp windows; Total genes with CREs [occupancy of core, soft-core and shell genes]. The dashes indicate that no results were retrieved.

(a)

| Drought modules                | Accession (footprintDB)                                            | Names                                      | consensus           | Protein (Swissprot)                                                                 | Ncor      | evalue       | sites | Genes with putative CREs in promoter     |                                                                      |
|--------------------------------|--------------------------------------------------------------------|--------------------------------------------|---------------------|-------------------------------------------------------------------------------------|-----------|--------------|-------|------------------------------------------|----------------------------------------------------------------------|
|                                |                                                                    |                                            |                     |                                                                                     |           |              |       | Proportion of genes with CREs per module | Total genes with CREs [occupancy of core, soft-core and shell genes] |
| <b>D 1</b><br><b>turquoise</b> | MA1353.1<br>(JASPAR 2020), M0609<br>(AthalianaCistrome v4_May2016) | AT1G72740,<br>AT1G72740.<br>DAP,<br>T04493 | ssmaAAACCCTA<br>Gey | Telomere repeat-binding factor 5 (MYB transcription factor)                         | 0.74<br>1 | 1.40E-<br>56 | 225   | 9.0%                                     | 178 [139 (78.1%); 26 (14.6%); 13 (7.3%)]                             |
| <b>D 2</b><br><b>blue</b>      | ABI4<br>(Athamap 20091028)                                         | ABI4                                       | scCACCaCCc          | Ethylene-responsive transcription factor ABI4 (Protein ABSCISIC ACID INSENSITIVE 4) | 0.69<br>7 | 5.80E-<br>07 | 178   | 17.1%                                    | 128 [102 (79.7%); 17 (13.3%); 9 (7.0%)]                              |

|            |               |                                                              |                            |                |                                                                                                                                                                                                                          |           |           |           |       |                                         |
|------------|---------------|--------------------------------------------------------------|----------------------------|----------------|--------------------------------------------------------------------------------------------------------------------------------------------------------------------------------------------------------------------------|-----------|-----------|-----------|-------|-----------------------------------------|
| <b>D 3</b> | <b>brown</b>  | M1684_1.02 (CISBP 1.02)                                      | T153999_1.02, WRKY60       | gtCGGTCAACgk   | Probable WRKY transcription factor 60 (WRKY DNA-binding protein 60) Calmodulin-binding transcription activator 1, AtCAMTA1 (Ethylene-induced calmodulin-binding protein b, EICBP.b) (Signal-responsive protein 2, AtSR2) | 0.877     | 1.30E-09  | 165       | 11.6% | 73 [54 (74.0%); 13 (17.8%); 6 (8.2%)]   |
| <b>D 4</b> | <b>yellow</b> | MA1197.1 (JASPAR 2020), M0350 (AthalianaCistrome v4_May2016) | CAMTA1, CAMTA1.DAP, T27097 | bgCGACGCGCTks  | Heat stress transcription factor B-3, AtHsfB3 (AtHsf-05)                                                                                                                                                                 | 0.717     | 7.80E-18  | 69        | 19.4% | 50 [26 (52.0%); 13 (26.0%); 11 (22.0%)] |
| <b>D 5</b> | <b>green</b>  | M0455 (AthalianaCistrome v4_May2016)                         | HSFB3.ampDAP, T08630       | kkCTCTrGAAGgk  | Not found                                                                                                                                                                                                                | 0.691     | 9.10E-13  | 89        | 27.8% | 47 [36 (76.6%); 5 (10.6%); 6 (12.8%)]   |
| <b>D 6</b> | <b>red</b>    | Not found                                                    | Not found                  | Not found      | Not found                                                                                                                                                                                                                | Not found | Not found | Not found | -     | -                                       |
| <b>D 7</b> | <b>black</b>  | AHL25_3 (Arabidopsis PBM 20140210)                           | AHL25                      | wcAAAATAAAATak | AT-hook motif nuclear-localized protein 25 (AT-hook protein of GA feedback 1)                                                                                                                                            | 0.643     | 0.46      | 35        | 54.2% | 26 [16 (61.6%); 5 (19.2%); 5 (19.2%)]   |

|    |         |                                                                                      |                              |                        |                                                                                                                                            |              |              |              |      |   |
|----|---------|--------------------------------------------------------------------------------------|------------------------------|------------------------|--------------------------------------------------------------------------------------------------------------------------------------------|--------------|--------------|--------------|------|---|
| D8 | pink    | MA1274.1<br>(JASPAR<br>2020), M025<br>6<br>(AthalianaCi<br>strome<br>v4_May2016<br>) | OBP3,<br>OBP3.DAP,<br>T16682 | mrArGAATArrrA<br>ARrdh | Probable<br>plastid-lipid-<br>associated<br>protein 14,<br>chloroplastic,<br>AtPap14 (Fibril<br>lin-11) (OBP3-<br>responsive<br>protein 1) | 0.62<br>3    | 1.50E-<br>12 | 14           | 3.5% | 2 |
| D9 | magenta | Not found                                                                            | Not found                    | Not found              | Not found                                                                                                                                  | Not<br>found | Not<br>found | Not<br>found | -    | - |

(b)

| Water<br>modules | Accession<br>(footprintDB) | Names                         | consensus                     | Protein<br>(Swissprot) | Ncor                                                          | evalue | sites        | Genes with putative CREs<br>in promoter                     |                                                                                  |                                                 |
|------------------|----------------------------|-------------------------------|-------------------------------|------------------------|---------------------------------------------------------------|--------|--------------|-------------------------------------------------------------|----------------------------------------------------------------------------------|-------------------------------------------------|
|                  |                            |                               |                               |                        |                                                               |        |              | Proporti<br>on of<br>genes<br>with<br>CREs<br>per<br>module | Total genes with<br>CREs<br>[occupancy of<br>core, soft-core<br>and shell genes] |                                                 |
| W1               | turquoise                  | M0587_1.02<br>(CISBP 1.02)    | PK22848.1,<br>T073801_1.02    | wkwcTAAAATTT<br>TAGwww | <i>No results</i>                                             | 0.59   | 6.80E-<br>29 | 32                                                          | 0.1%                                                                             | 2                                               |
| W2               | blue                       | At2g20350:M051<br>32:TRANSFAC | At2g20350/M05<br>132/TRANSFAC | mmAGGCCCATC<br>wv      | Ethylene-<br>responsive<br>transcriptio<br>n factor<br>ERF120 | 0.59   | 1.90E-<br>97 | 244                                                         | 22.3%                                                                            | 162 [115 (71.0%);<br>25 (15.4%); 22<br>(13.6%)] |

|    |               |                                                                          |                                                                                                                                                                                   |                     |                                                                                                                                                                                                      |           |              |           |      |                                             |
|----|---------------|--------------------------------------------------------------------------|-----------------------------------------------------------------------------------------------------------------------------------------------------------------------------------|---------------------|------------------------------------------------------------------------------------------------------------------------------------------------------------------------------------------------------|-----------|--------------|-----------|------|---------------------------------------------|
| W3 | <b>brown</b>  | Not found                                                                | Not found                                                                                                                                                                         | Not found           | Not found                                                                                                                                                                                            | Not found | Not found    | Not found | -    | -                                           |
| W4 | <b>yellow</b> | MA1379.1<br>(JASPAR<br>2020), M0357<br>(AthalianaCistrome<br>v4_May2016) | SOL1,<br>SOL1.DAP,<br>T15201                                                                                                                                                      | wwTTAAwwdd<br>AAAwr | Carboxypep<br>tidase<br>SOL1, EC<br>3.4.17.- (Pr<br>otein<br>SUPPRESS<br>OR OF<br>LLP1 1)<br>Transcriptio<br>n factor<br>VOZ2 (Prot<br>ein<br>VASCULA<br>R PLANT<br>ONE-ZINC<br>FINGER 2,<br>AtVOZ2) | 0.662     | 1.10E-<br>09 | 458       | 0.3% | 2                                           |
| W5 | <b>green</b>  | UP00581A_2<br>(UniPROBE<br>20160601)                                     | vascular plant<br>one zinc finger<br>protein 2, VOZ2                                                                                                                              | sgAGTCAACGtcg<br>v  | Transcriptio<br>n factor<br>MYB58                                                                                                                                                                    | 0.88      | 1.90E-<br>10 | 126       | 5.7% | 29 [20 (69.0%); 4<br>(13.8%); 5<br>(17.2%)] |
| W6 | <b>red</b>    | M0523<br>(AthalianaCistrome<br>v4_May2016)                               | MYB58.DAP,<br>T03869                                                                                                                                                              | ytgCyACCAACC<br>Avm | Transcriptio<br>n factor<br>MYB58                                                                                                                                                                    | 0.837     | 1.10E-<br>11 | 45        | 2.5% | 9                                           |
| W7 | <b>black</b>  | UP00582A_2<br>(UniPROBE<br>20160601)                                     | ARABIDOPSIS<br>THALIANA<br>WRKY DNA-<br>BINDING<br>PROTEIN 18,<br>At4g31800,<br>AtWRKY18,<br>F11C18.16,<br>F28M20.10,<br>WRKY<br>transcription<br>factor 1, WRKY<br>transcription | mmsGGTCAAAC<br>Gyr  | WRKY<br>transcriptio<br>n factor 18                                                                                                                                                                  | 0.698     | 7.40E-<br>07 | 27        | 6.1% | 19 [17 (89.5%); 2<br>(10.5%); 0<br>(0.0%)]  |

|     |              |                                                                       |                                  |                       |                                                                                                                                                                                                        |           |              |           |       |                                               |  |
|-----|--------------|-----------------------------------------------------------------------|----------------------------------|-----------------------|--------------------------------------------------------------------------------------------------------------------------------------------------------------------------------------------------------|-----------|--------------|-----------|-------|-----------------------------------------------|--|
|     |              |                                                                       |                                  |                       | factor 18,<br>WRKY1                                                                                                                                                                                    |           |              |           |       |                                               |  |
| W8  | pink         | Not found                                                             | Not found                        | Not found             | Not found                                                                                                                                                                                              | Not found | Not found    | Not found | -     | -                                             |  |
| W9  | magenta      | MA1197.1<br>(JASPAR<br>2020), M0350<br>(AthalianaCistrome v4_May2016) | CAMTA1,<br>CAMTA1.DAP,<br>T27097 | ssaCCGCGTcss          | Calmodulin-<br>binding<br>transcription<br>activator<br>1,<br>AtCAMTA<br>1 (Ethylene-<br>induced<br>calmodulin-<br>binding<br>protein b,<br>EICBP.b)<br>(Signal-<br>responsive<br>protein 2,<br>AtSR2) | 0.755     | 4.50E-<br>19 | 95        | 23.0% | 55 [28 (50.9%);<br>12 (21.8%); 15<br>(27.3%)] |  |
| W10 | purple       | Not found                                                             | Not found                        | Not found             | Not found                                                                                                                                                                                              | Not found | Not found    | Not found | -     | -                                             |  |
| W11 | green-yellow | Not found                                                             | Not found                        | Not found             | Not found                                                                                                                                                                                              | Not found | Not found    | Not found | -     | -                                             |  |
| W12 | tan          | Not found                                                             | Not found                        | Not found             | Not found                                                                                                                                                                                              | Not found | Not found    | Not found | -     | -                                             |  |
| W13 | salmon       | Not identified                                                        | Not identified                   | trAAATymwwwT<br>TCAht | Not<br>identified                                                                                                                                                                                      | 0.504     | 0.00017      | 35        | 20.0% | 8                                             |  |



**Table 4.** Occupancies [core (33 accessions); soft-core (31-32 accessions) and shell ( $\leq 30$  accessions)] of the co-expressed genes (**a; b**) and hub genes (**c; d**) for each module of the Drought (D) and Water (W) co-expression networks. Asterisks indicate significant differences comparing shell and total genes between modules and network by Fisher test (\* $p \leq 0.05$ ; \*\* $p \leq 0.01$ ; \*\*\* $p \leq 0.001$ ).

(a)

|                                                    |              | <b>Drought genes occupancy</b> |                             |                                     |                     |
|----------------------------------------------------|--------------|--------------------------------|-----------------------------|-------------------------------------|---------------------|
| <b>Drought modules</b>                             | <b>Genes</b> | <b>Core (33)</b>               | <b>Soft-core (32 or 31)</b> | <b>Shell (<math>\leq 30</math>)</b> |                     |
| D0                                                 | gray         | 8313                           | 5764 (69.3%)                | 1269 (15.3%)                        | 1280 (15.4%)        |
| D1                                                 | turquoise    | 1986                           | 1422 (71.6%)                | 265 (13.3%)                         | 299 (15.1%)         |
| D2                                                 | blue         | 750                            | 549 (73.2%)                 | 126 (16.8%)                         | 75 (10.0%***)       |
| D3                                                 | brown        | 627                            | 440 (70.2%)                 | 117 (18.7%)                         | 70 (11.2%*)         |
| D4                                                 | yellow       | 258                            | 160 (62.0%)                 | 49 (19.0%)                          | 49 (19.0%)          |
| D5                                                 | green        | 169                            | 123 (72.8%)                 | 27 (16.0%)                          | 19 (11.2%)          |
| D6                                                 | red          | 95                             | 62 (65.3%)                  | 18 (19.0%)                          | 15 (15.8%)          |
| D7                                                 | black        | 48                             | 28 (58.3%)                  | 9 (18.8%)                           | 11 (22.9%)          |
| D8                                                 | pink         | 57                             | 17 (29.8%)                  | 4 (7.0%)                            | 36 (63.2%***)       |
| D9                                                 | magenta      | 27                             | 20 (74.1%)                  | 6 (22.2%)                           | 1 (3.7%)            |
| <b>Total counts</b>                                |              | <b>12330</b>                   | <b>8585 (69.6%)</b>         | <b>1890 (15.3%)</b>                 | <b>1855 (15.0%)</b> |
| <b>Total unique counts</b>                         |              | <b>12137</b>                   | <b>8426 (69.4)</b>          | <b>1869 (15.4%)</b>                 | <b>1842 (15.2%)</b> |
| <b>Total unique counts (excluding gray module)</b> |              | <b>4006</b>                    | <b>2813 (70.2%)</b>         | <b>618 (15.4%)</b>                  | <b>575 (14.4%)</b>  |

(b)

|                                                    |              | <b>Water genes occupancy</b> |                             |                                     |                     |
|----------------------------------------------------|--------------|------------------------------|-----------------------------|-------------------------------------|---------------------|
| <b>Water modules</b>                               | <b>Genes</b> | <b>Core (33)</b>             | <b>Soft-core (32 or 31)</b> | <b>Shell (<math>\leq 30</math>)</b> |                     |
| W0                                                 | gray         | 6934                         | 4788 (69.1%)                | 1006 (14.5%)                        | 1140 (16.4%*)       |
| W1                                                 | turquoise    | 1439                         | 1094 (76.0%)                | 188 (13.1%)                         | 157 (10.9%***)      |
| W2                                                 | blue         | 727                          | 544 (74.8%)                 | 111 (15.3%)                         | 72 (9.9%***)        |
| W3                                                 | brown        | 696                          | 500 (71.8%)                 | 128 (18.4%)                         | 68 (9.8%***)        |
| W4                                                 | yellow       | 590                          | 353 (59.8%)                 | 73 (12.4%)                          | 164 (27.8%***)      |
| W5                                                 | green        | 509                          | 375 (73.7%)                 | 101 (19.8%)                         | 33 (6.5%***)        |
| W6                                                 | red          | 358                          | 258 (72.1%)                 | 67 (18.7%)                          | 33 (9.2%**)         |
| W7                                                 | black        | 313                          | 216 (69.0%)                 | 59 (18.8%)                          | 38 (12.1%)          |
| W8                                                 | pink         | 245                          | 162 (66.1%)                 | 50 (20.4%)                          | 33 (13.5%)          |
| W9                                                 | magenta      | 239                          | 124 (51.9%)                 | 63 (26.4%)                          | 52 (21.8%*)         |
| W10                                                | purple       | 185                          | 127 (68.6%)                 | 36 (19.5%)                          | 22 (11.9%)          |
| W11                                                | greenyellow  | 55                           | 33 (60.0%)                  | 8 (14.5%)                           | 14 (25.5%)          |
| W12                                                | tan          | 51                           | 31 (60.8%)                  | 6 (11.8%)                           | 14 (27.5%)          |
| W13                                                | salmon       | 40                           | 13 (32.5%)                  | 3 (7.5%)                            | 24 (60.0%***)       |
| <b>Total counts</b>                                |              | <b>12381</b>                 | <b>8618 (69.6%)</b>         | <b>1899 (15.3%)</b>                 | <b>1864 (15.1%)</b> |
| <b>Total unique counts</b>                         |              | <b>12137</b>                 | <b>8426 (69.4)</b>          | <b>1869 (15.4%)</b>                 | <b>1842 (15.2%)</b> |
| <b>Total unique counts (excluding gray module)</b> |              | <b>5407</b>                  | <b>3795 (70.2%)</b>         | <b>890 (16.5%)</b>                  | <b>722 (13.3%)</b>  |

(c)

| <b>Drought hub genes (KME&gt;0.9) occupancy</b> |           |                   |                      |                 |           |
|-------------------------------------------------|-----------|-------------------|----------------------|-----------------|-----------|
| Drought modules                                 | Hub Genes | Core (33)         | Soft-core (32 or 31) | Shell (≤30)     |           |
| D1                                              | turquoise | 3                 | 3 (100%)             | 0 (0%)          | 0 (0%)    |
| D2                                              | blue      | 13                | 10 (76.9%)           | 1 (7.7%)        | 2 (15.4%) |
| D3                                              | brown     | 38                | 20 (52.6%)           | 18 (47.4%)      | 0 (0%)    |
| D4                                              | yellow    | 4                 | 3 (75%)              | 1 (25%)         | 0 (0%)    |
| D5                                              | green     | 3                 | 3 (100%)             | 0 (0%)          | 0 (0%)    |
| D6                                              | red       | 7                 | 4 (57.1%)            | 3 (42.9%)       | 0 (0%)    |
| D7                                              | black     | 4                 | 0 (0%)               | 0 (0%)          | 4 (100%)  |
| D8                                              | pink      | 0                 | 0 (0%)               | 0 (0%)          | 0 (0%)    |
| D9                                              | magenta   | 0                 | 0 (0%)               | 0 (0%)          | 0 (0%)    |
| <b>Total counts</b>                             | <b>72</b> | <b>43 (59.7%)</b> | <b>23 (31.9%)</b>    | <b>6 (8.3%)</b> |           |
| <b>Total unique counts</b>                      | <b>72</b> | <b>43 (59.7%)</b> | <b>23 (31.9%)</b>    | <b>6 (8.3%)</b> |           |

(d)

| <b>Water hub genes (KME&gt;0.9) occupancy</b> |             |                    |                      |                   |            |
|-----------------------------------------------|-------------|--------------------|----------------------|-------------------|------------|
| Water modules                                 | Hub Genes   | Core (33)          | Soft-core (32 or 31) | Shell (≤30)       |            |
| W1                                            | turquoise   | 115                | 82 (71.3%)           | 18 (15.7%)        | 15 (13.0%) |
| W2                                            | blue        | 3                  | 2 (66.7%)            | 1 (33.3%)         | 0 (0%)     |
| W3                                            | brown       | 1                  | 1 (100%)             | 0 (0%)            | 0 (0%)     |
| W4                                            | yellow      | 2                  | 1 (50%)              | 0 (0%)            | 1 (50%)    |
| W5                                            | green       | 10                 | 6 (60%)              | 3 (30%)           | 1 (10%)    |
| W6                                            | red         | 8                  | 7 (87.5%)            | 1 (12.5%)         | 0 (0%)     |
| W7                                            | black       | 23                 | 16 (69.6%)           | 7 (30.4%)         | 0 (0%)*    |
| W8                                            | pink        | 2                  | 2 (100%)             | 0 (0%)            | 0 (0%)     |
| W9                                            | magenta     | 21                 | 13 (61.9%)           | 1 (4.8%)          | 7 (33.3%)  |
| W10                                           | purple      | 2                  | 2 (100%)             | 0 (0%)            | 0 (0%)     |
| W11                                           | greenyellow | 1                  | 1 (100%)             | 0 (0%)            | 0 (0%)     |
| W12                                           | tan         | 1                  | 0 (0%)               | 0 (0%)            | 1 (100%)   |
| W13                                           | salmon      | 1                  | 1 (100%)             | 0 (0%)            | 0 (0%)     |
| <b>Total counts</b>                           | <b>190</b>  | <b>134 (70.5%)</b> | <b>31 (16.3%)</b>    | <b>25 (13.2%)</b> |            |

---

|                            |            |                    |                   |                   |
|----------------------------|------------|--------------------|-------------------|-------------------|
| <b>Total unique counts</b> | <b>190</b> | <b>134 (70.5%)</b> | <b>31 (16.3%)</b> | <b>25 (13.2%)</b> |
|----------------------------|------------|--------------------|-------------------|-------------------|

---

**Table 5.** Pan-genome analysis of the differentially expressed (DE) isoforms according to their gene occupancy: core (33 accessions), soft-core (31-32 accessions) and shell ( $\leq 30$  accessions). \* One gene was represented by one up-regulated and one down-regulated isoform.

|                          | Gene occupancy |             |             | TOTAL       |
|--------------------------|----------------|-------------|-------------|-------------|
|                          | core           | soft-core   | shell       |             |
| <b>upregulated</b>       | 2027 (72.2%)   | 500 (17.8%) | 281 (10%)   | <b>2808</b> |
| <b>downregulated</b>     | 661 (67.5%)    | 205 (20.9%) | 114 (11.6%) | <b>980</b>  |
| <b>up/down-regulated</b> | 1*             | 0           | 0           | <b>1</b>    |
| <b>TOTAL</b>             | <b>2689</b>    | <b>705</b>  | <b>395</b>  | <b>3789</b> |

## FIGURES

**Figure 1.** Summary of the experimental design and analyses performed in the 33 accessions of the model grass *Brachypodium distachyon* under drought (D) and water (control) (W) conditions.

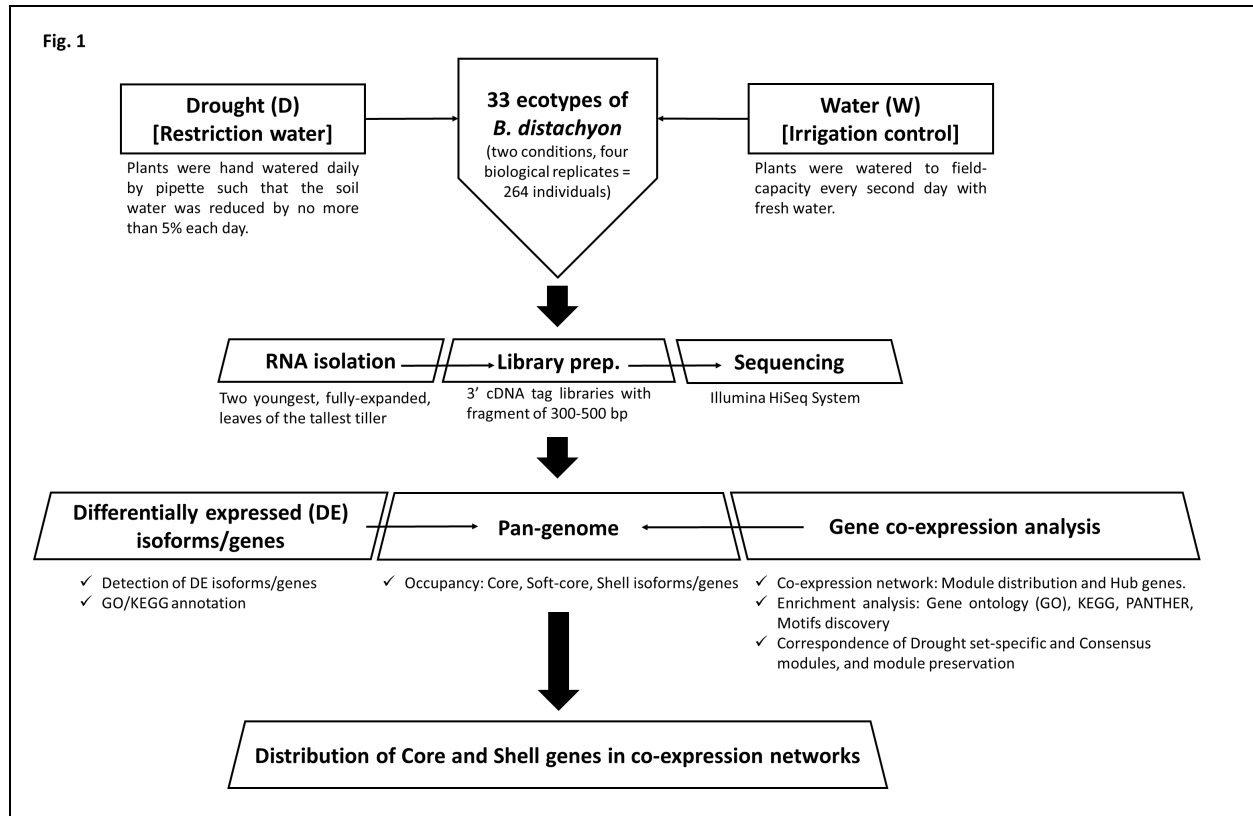

**Figure 2** Correspondence (number of nodes) of Drought (D) (a) and Water (W) (b) set-specific and Drought-Water consensus (Cons) modules. Each row of the table corresponds to one Drought/Water set-specific module, and each column corresponds to one consensus module. Numbers in the table indicate node counts in the intersection of the corresponding modules. Coloring of the table encodes  $-\log(p)$ , with  $p$  being the Fisher's exact test p-value for the overlap of the two modules. The stronger the red color, the more significant the overlap is. (c) Comparison of the GO enrichments for each D and W module, according to the correlation with the common consensus module.

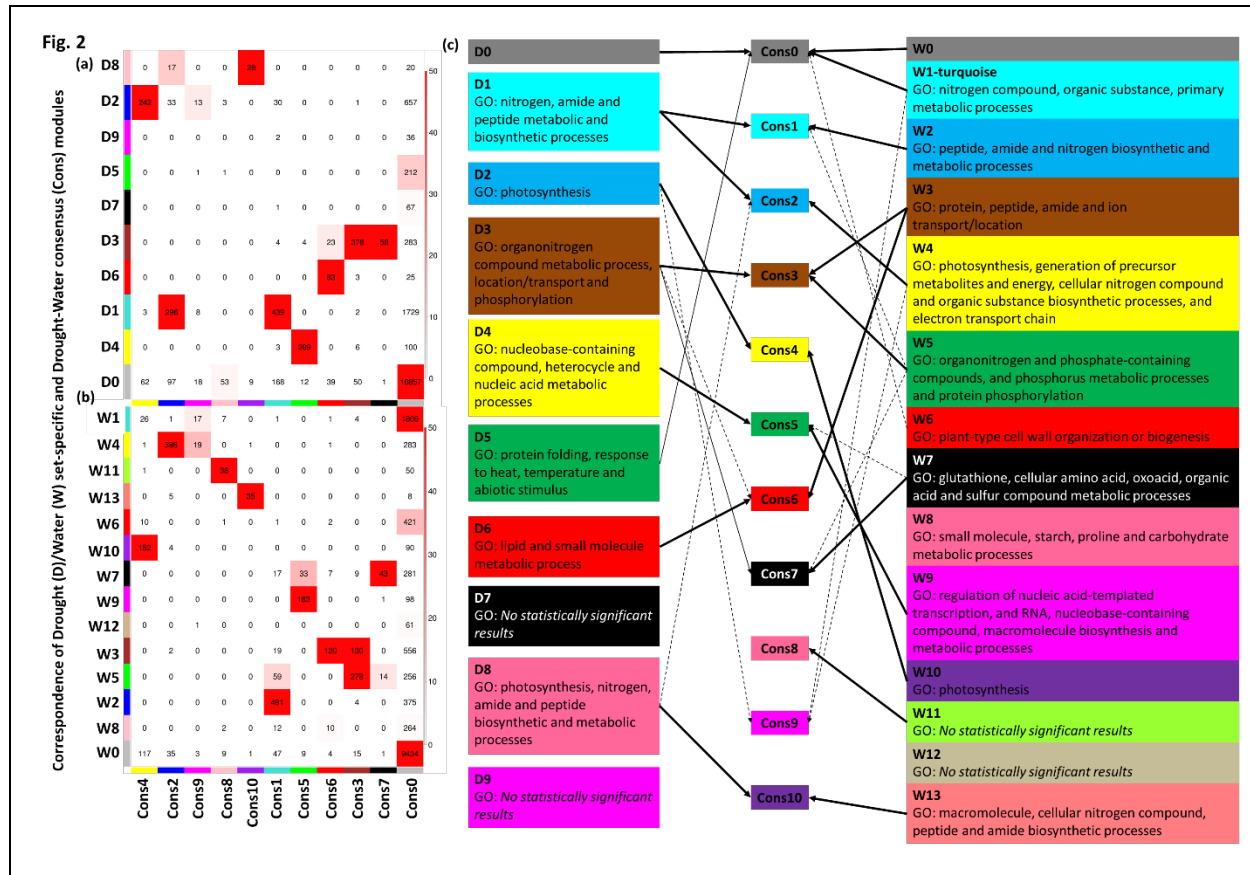

**Figure 3.** Proportion (%) of occupancies [core (33); soft-core (31-32) and shell ( $\leq 30$ )] of the co-expressed genes (a; b) and hub genes (c; d) for each Drought (D) and Water (W) network.

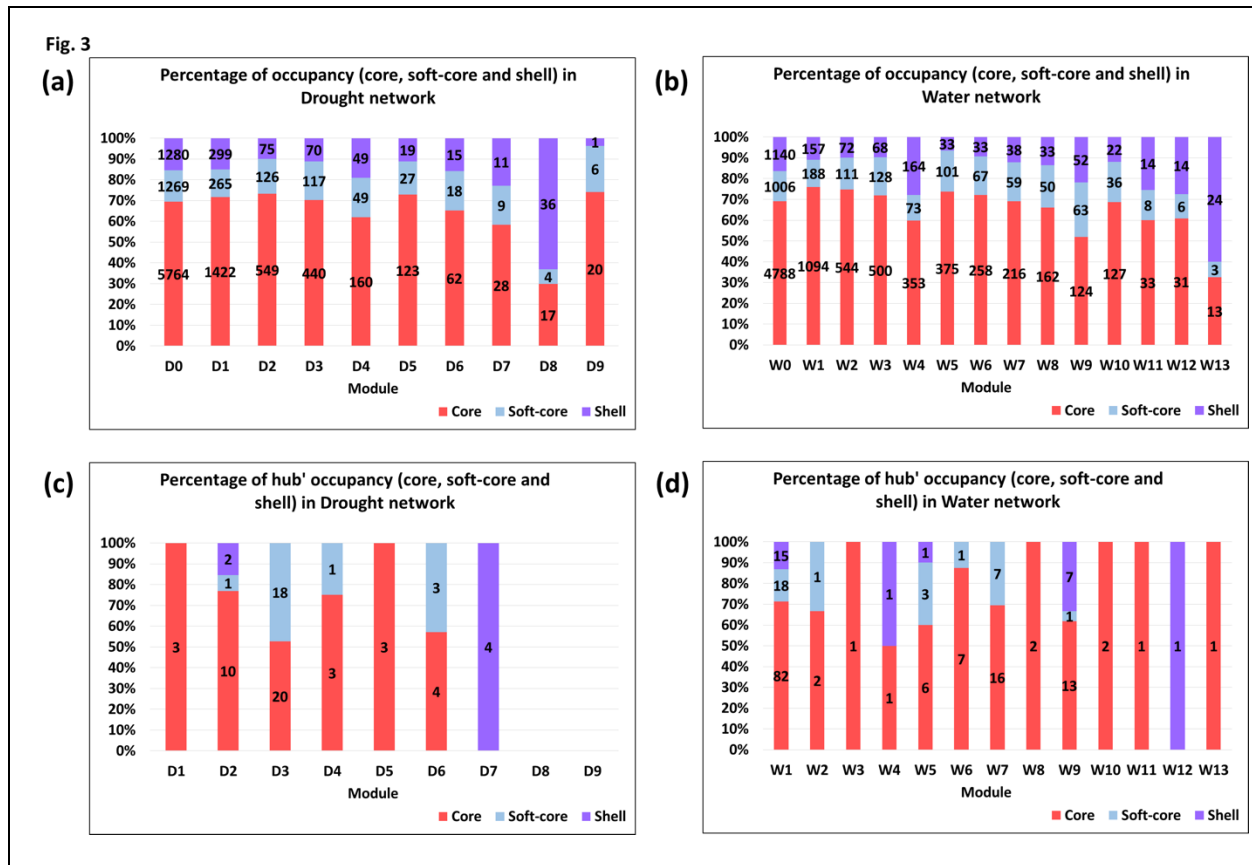

Source: https://www.biorxiv.org/content/10.1101/2021.07.21.453242v2.full.pdf
